# Supplementary material
Source: PubMed Central journal article supplement (PMC8213376)
Supplement: mmc1.pdf [file mmc1.pdf]

# THE LANCET

## Rheumatology

### Supplementary appendix

This appendix formed part of the original submission and has been peer reviewed.  
We post it as supplied by the authors.

Supplement to: Shin Y H, Shin J II, Moon S Y, et al. Autoimmune inflammatory rheumatic diseases and COVID-19 outcomes in South Korea: a nationwide cohort study. *Lancet Rheumatol* 2021; published online June 18. [https://doi.org/10.1016/S2665-9913\(21\)00151-X](https://doi.org/10.1016/S2665-9913(21)00151-X).

---

## Contents of supplementary appendix

|                  |                                                                                                                                                                                                                                                                                                       |           |
|------------------|-------------------------------------------------------------------------------------------------------------------------------------------------------------------------------------------------------------------------------------------------------------------------------------------------------|-----------|
| <b>Table S1</b>  | Sensitivity analyses and justification.                                                                                                                                                                                                                                                               | <b>3</b>  |
| <b>Table S2</b>  | Baseline covariates of patients who underwent the SARS-CoV-2 test in the nationwide cohort.                                                                                                                                                                                                           | <b>6</b>  |
| <b>Table S3</b>  | 3:1 propensity score-matched covariates and aOR (95% CI) of positive SARS-CoV-2 test, severe COVID-19 outcomes, or COVID-19-related death in patients with AIRD, IA, or CTD (matched cohort D-F).                                                                                                     | <b>9</b>  |
| <b>Table S4</b>  | Propensity-score-matched subgroup analysis of aOR (95% CI) of positive SARS-CoV-2 test, severe COVID-19 outcomes, or COVID-19-related death in patients with AIRD stratified by DMARD and systemic steroid (matched cohort D).                                                                        | <b>13</b> |
| <b>Table S5</b>  | 3:1 propensity score-matched covariates selected by DAGs and aOR (95% CI) of positive SARS-CoV-2 test, severe COVID-19 outcomes, or COVID-19-related death in patients with AIRD, IA, or CTD in the Korean nationwide cohort linked with the general health examination records (matched cohort G-I). | <b>16</b> |
| <b>Table S6</b>  | 3:1 propensity score-matched covariates selected by DAGs and aOR (95% CI) of positive SARS-CoV-2 test, severe COVID-19 outcomes, or COVID-19-related death in patients with AIRD, IA, or CTD in the Korean nationwide cohort (matched cohort J-L).                                                    | <b>22</b> |
| <b>Figure S1</b> | Disposition of patients in the Korean nationwide cohort without linking the general health examination records                                                                                                                                                                                        | <b>25</b> |
| <b>Figure S2</b> | Flowchart showing the study enrollment in the Korean nationwide cohort without linking the general health examination records                                                                                                                                                                         | <b>26</b> |
| <b>Figure S3</b> | The density and distribution of propensity scores before and after matching in matched cohort A                                                                                                                                                                                                       | <b>27</b> |
| <b>Figure S4</b> | The density and distribution of propensity scores before and after matching in matched cohort B                                                                                                                                                                                                       | <b>28</b> |
| <b>Figure S5</b> | The density and distribution of propensity scores before and after matching in matched cohort C                                                                                                                                                                                                       | <b>29</b> |
| <b>Figure S6</b> | The density and distribution of propensity scores before and after matching in matched cohort D                                                                                                                                                                                                       | <b>30</b> |

|                          |                                                                                                                                                                                                                                             |           |
|--------------------------|---------------------------------------------------------------------------------------------------------------------------------------------------------------------------------------------------------------------------------------------|-----------|
| <b>Figure S7</b>         | The density and distribution of propensity scores before and after matching in matched cohort E                                                                                                                                             | <b>31</b> |
| <b>Figure S8</b>         | The density and distribution of propensity scores before and after matching in matched cohort F                                                                                                                                             | <b>32</b> |
| <b>Figure S9</b>         | The density and distribution of propensity scores before and after matching in matched cohort G                                                                                                                                             | <b>33</b> |
| <b>Figure S10</b>        | The density and distribution of propensity scores before and after matching in matched cohort H                                                                                                                                             | <b>34</b> |
| <b>Figure S11</b>        | The density and distribution of propensity scores before and after matching in matched cohort I                                                                                                                                             | <b>35</b> |
| <b>Figure S12</b>        | The density and distribution of propensity scores before and after matching in matched cohort J                                                                                                                                             | <b>36</b> |
| <b>Figure S13</b>        | The density and distribution of propensity scores before and after matching in matched cohort K                                                                                                                                             | <b>37</b> |
| <b>Figure S14</b>        | The density and distribution of propensity scores before and after matching in matched cohort L                                                                                                                                             | <b>38</b> |
| <b>Figure S15</b>        | Directed acyclic graph demonstrating the implicitly assumed causal association between AIRD (“exposure”) and risk of COVID-19 (“outcome”) in the Korean nationwide cohort linked to the general health examination records before matching. | <b>39</b> |
| <b>Figure S16</b>        | Directed acyclic graph showing the implicitly assumed causal association between AIRD (“exposure”) and risk of COVID-19 (“outcome”) in the Korean nationwide cohort without linking the general health examination records before matching. | <b>40</b> |
| <b>Figure S17</b>        | Propensity score-matched association of AIRD with SARS-CoV-2                                                                                                                                                                                | <b>41</b> |
| <b>Figure S18</b>        | Propensity score-matched association of IA with SARS-CoV-2                                                                                                                                                                                  | <b>42</b> |
| <b>Figure S19</b>        | Propensity score-matched association of CTD with SARS-CoV-2                                                                                                                                                                                 | <b>43</b> |
| <b>Supplement Method</b> | ICD-10 codes used to define etiology                                                                                                                                                                                                        | <b>44</b> |

---

**Table S1.** Sensitivity analyses and justification.

| Sensitivity analysis (1 to 10)                                                                                                                                  | Cohort                 | Justification                                                                                                                                                                                                                                                                                                                                                                                                                                                                                                                                                                                                                                                                                                           |
|-----------------------------------------------------------------------------------------------------------------------------------------------------------------|------------------------|-------------------------------------------------------------------------------------------------------------------------------------------------------------------------------------------------------------------------------------------------------------------------------------------------------------------------------------------------------------------------------------------------------------------------------------------------------------------------------------------------------------------------------------------------------------------------------------------------------------------------------------------------------------------------------------------------------------------------|
| 1. Risk of positive SARS-CoV-2 test, severe COVID-19 outcomes, or COVID-19-related death in patients with AIRD, IA, or CTD                                      | Matched cohort A, B, C | <ul style="list-style-type: none"><li>- Main results</li><li>- Social-economic status, body mass index, physical activity, cigarette smoking, and consuming alcoholic drinks can affect the COVID-19 and AIRD. We consider these covariates by linking the national general health examination results.</li><li>- Matching covariates were selected for age; sex; region of residence; resident of a skilled nursing facility; a history of diabetes mellitus, cardiovascular disease, cerebrovascular disease, COPD, hypertension, and chronic kidney disease; household income ; smoking; alcoholic drinks; body mass index; sufficient aerobic activity; and current use of aspirin, metformin, and statin</li></ul> |
| 2. Subgroup analysis of the risk of positive SARS-CoV-2 test, severe COVID-19 outcomes, or COVID-19-related death in patients with AIRD stratified by DMARD and | Matched cohort A       | <ul style="list-style-type: none"><li>- To investigate the association of COVID-19-related outcomes by current use of DMARD and systemic steroid.</li></ul>                                                                                                                                                                                                                                                                                                                                                                                                                                                                                                                                                             |

---

systemic steroid

---

|                                                                                                                                                                                  |                        |                                                                                                                                                                                                                                                                                                                                                                                                                                              |
|----------------------------------------------------------------------------------------------------------------------------------------------------------------------------------|------------------------|----------------------------------------------------------------------------------------------------------------------------------------------------------------------------------------------------------------------------------------------------------------------------------------------------------------------------------------------------------------------------------------------------------------------------------------------|
| 3. Risk of positive SARS-CoV-2 test, severe COVID-19 outcomes, or COVID-19-related death in patients with AIRD, IA, or CTD                                                       | Matched cohort D, E, F | <p>- We constructed an original dataset without linking the general health examination records to obtain a large sample number.</p> <p>- Matching covariates were selected for age; sex; region of residence; resident of a skilled nursing facility; a history of diabetes mellitus, cardiovascular disease, cerebrovascular disease, COPD, hypertension, and chronic kidney disease; and current use of aspirin, metformin, and statin</p> |
| 4. Subgroup analysis of the risk of positive SARS-CoV-2 test, severe COVID-19 outcomes, or COVID-19-related death in patients with AIRD stratified by DMARD and systemic steroid | Matched cohort D       | <p>- To investigate the association of COVID-19-related outcomes by current use of DMARD and systemic steroid.</p>                                                                                                                                                                                                                                                                                                                           |
| 5. Risk of positive SARS-CoV-2 test, severe COVID-19 outcomes, or COVID-19-related death in patients with AIRD                                                                   | Full-unmatched cohort  | <p>- Propensity score matching can introduce unintended bias into the estimation. We repeated the main analysis by analysis from unmatched subjects.</p>                                                                                                                                                                                                                                                                                     |
| 7. Risk of positive SARS-CoV-2 test, severe COVID-19                                                                                                                             | Matched cohort G, H, I | <p>- To avoid overmatching issues, we selected the matching covariates in</p>                                                                                                                                                                                                                                                                                                                                                                |

---

---

outcomes, or COVID-19-related death in patients with  
AIRD, IA, or CTD

matched A, B, C by using the DAG approach. DAGs can be used to  
select covariates for support causal interpretation.

- Matching covariates were selected for age; sex; region of residence;  
resident of a skilled nursing facility.

---

8. Risk of positive SARS-CoV-2 test, severe COVID-19  
outcomes, or COVID-19-related death in patients with  
AIRD, IA, or CTD

Matched cohort J, K, L

- To avoid overmatching issues, we selected the matching covariates in  
matched D, E, F by using the DAG approach. DAGs can be used to  
select covariates for support causal interpretation.

- Matching covariates were selected for age; sex; region of residence;  
resident of a skilled nursing facility; household income ; smoking;  
alcoholic drinks; body mass index.

---

AIRD, autoimmune inflammatory rheumatic disease; COPD, chronic obstructive pulmonary disease; CTD, connective tissue disease;

DMARD, disease-modifying antirheumatic drug; IA, inflammatory arthritis; SARS-CoV-2, severe acute respiratory syndrome coronavirus 2.

**Table S2.** Baseline covariates of patients who underwent the SARS-CoV-2 test in the nationwide cohort.

| Characteristics            | Entire cohort  | AIRD        | AIRD        |             |
|----------------------------|----------------|-------------|-------------|-------------|
|                            |                |             | IA          | CTD         |
| Total, n (%)               | 212,678        | 11,766      | 10,038      | 2875        |
| Age, years, n (%)          |                |             |             |             |
| 20-39                      | 78,372 (36.9)  | 1590 (13.5) | 1247 (12.4) | 581 (20.2)  |
| 40-59                      | 63,057 (29.7)  | 3303 (28.1) | 2772 (27.6) | 950 (33.0)  |
| ≥ 60                       | 71,249 (33.5)  | 6873 (58.4) | 6019 (60.0) | 1344 (46.8) |
| Sex, n (%)                 |                |             |             |             |
| Male                       | 100,038 (47.0) | 4284 (36.4) | 3647 (36.3) | 905 (31.5)  |
| Female                     | 112,640 (53.0) | 7482 (63.6) | 6391 (63.7) | 1970 (68.5) |
| Region of residence, n (%) |                |             |             |             |

|                                               |               |             |             |             |
|-----------------------------------------------|---------------|-------------|-------------|-------------|
| Seoul Capital Area                            | 97,733 (46.0) | 5410 (46.0) | 4527 (45.1) | 1433 (49.8) |
| Daegu/Gyeongbuk area                          | 39,063 (18.4) | 2150 (18.3) | 1925 (19.2) | 431(15.0)   |
| Other area                                    | 75,882 (35.7) | 4206 (35.8) | 3586 (35.7) | 1011 (35.2) |
| Resident of a skilled nursing facility, n (%) | 13,015 (6.1)  | 1045 (8.9)  | 898 (9.0)   | 190 (6.6)   |
| History of diabetes mellitus, n (%)           | 44,845 (21.1) | 4890 (41.6) | 4257 (42.4) | 1072 (37.3) |
| History of cardiovascular disease, n (%)      | 40,526 (19.1) | 4640 (39.4) | 3956 (39.4) | 1126 (39.2) |
| History of cerebrovascular disease, n (%)     | 25,991 (12.2) | 2784 (23.7) | 2420 (24.1) | 586 (20.4)  |
| History of COPD, n (%)                        | 25,081 (11.8) | 2841 (24.2) | 2435 (24.3) | 667 (23.2)  |
| History of hypertension, n (%)                | 68,817 (32.4) | 6706 (57.0) | 5801 (57.8) | 1502 (52.2) |
| History of chronic kidney disease, n (%)      | 18,561 (8.7)  | 2306 (19.6) | 1900 (18.9) | 651 (22.6)  |
| Current use of aspirin, n (%)                 | 17,551 (8.3)  | 1722 (14.6) | 1490 (14.8) | 398 (13.8)  |
| Current use of metformin, n (%)               | 19,687 (9.3)  | 1734 (14.7) | 1538 (15.3) | 316 (11.0)  |
| Current use of statin, n (%)                  | 42,695 (20.1) | 4294 (36.5) | 3759 (37.5) | 891 (31.0)  |



|                                              |               |             |             |             |
|----------------------------------------------|---------------|-------------|-------------|-------------|
| Current use of systemic steroid, n (%)       | 26,048 (12.2) | 2808 (23.9) | 2992 (29.8) | 1404 (48.8) |
| Current use of DMARDs, n (%)                 | 7713          |             |             |             |
| Methotrexate–leflunomide–azathioprine, n (%) | 12,503 (5.9)  | 5243 (44.6) | 4592 (45.7) | 1921 (66.8) |
| Sulfasalazine, n (%)                         | 716 (0.3)     | 652 (5.5)   | 636 (6.3)   | 153 (5.3)   |
| Antimalarials, n (%)                         | 11749 (5.5)   | 2620 (22.2) | 2257 (22.5) | 1196 (41.6) |
| Anti-TNF-alpha agent, n (%)                  | 1448 (0.7)    | 752 (6.4)   | 685 (6.8)   | 203 (7.1)   |
| Other biologics, n (%)                       | 2160 (1.0)    | 529 (4.5)   | 490 (4.9)   | 121 (4.2)   |

---

AIRD, autoimmune inflammatory rheumatic disease; COPD, chronic obstructive pulmonary disease; CTD, connective tissue disease; DMARD, disease-modifying antirheumatic drug; IA, inflammatory arthritis; SARS-CoV-2, severe acute respiratory syndrome coronavirus 2; SD, standard deviation; TNF; tumor necrosis factor.

**Table S3.** 3:1 propensity score-matched covariates and aOR (95% CI) of positive SARS-CoV-2 test, severe COVID-19 outcomes, or COVID-19-related death in patients with AIRD, IA, or CTD.

| Characteristics   | Matched cohort D |             |       | Matched cohort E |             |       | Matched cohort F |             |       |
|-------------------|------------------|-------------|-------|------------------|-------------|-------|------------------|-------------|-------|
|                   | None             | AIRD        | SMD   | None             | IA**        | SMD   | None             | CTD**       | SMD   |
| Total, n (%)      | 34,343           | 11,698      |       | 29,578           | 9991        |       | 8352             | 2832        |       |
| Age, years, n (%) |                  |             | 0.022 |                  |             | 0.014 |                  |             | 0.023 |
| 20-39             | 4352 (12.7)      | 1559 (13.3) |       | 3541 (12.0)      | 1237 (12.4) |       | 1552 (18.6)      | 547 (19.3)  |       |
| 40-59             | 9475 (27.6)      | 3276 (28.0) |       | 8062 (27.3)      | 2750 (27.5) |       | 2744 (32.9)      | 942 (33.3)  |       |
| ≥ 60              | 20,516 (59.7)    | 6863 (58.7) |       | 17,975 (60.8)    | 6004 (60.1) |       | 4056 (48.6)      | 1343 (47.4) |       |
| Sex, n (%)        |                  |             | 0.019 |                  |             | 0.013 |                  |             | 0.007 |
| Male              | 12,894 (37.5)    | 4284 (36.6) |       | 10,976 (37.1)    | 3646 (36.5) |       | 2691 (32.2)      | 903 (31.9)  |       |
| Female            | 21,449 (62.5)    | 7414 (63.4) |       | 18,602 (62.9)    | 6345 (63.5) |       | 5661 (67.8)      | 1929 (68.1) |       |

|                                               |               |             |       |               |             |       |             |             |       |
|-----------------------------------------------|---------------|-------------|-------|---------------|-------------|-------|-------------|-------------|-------|
| Region of residence, n (%)                    |               |             | 0.004 |               |             | 0.002 |             |             | 0.018 |
| Seoul Capital Area                            | 15,808 (46.0) | 5377 (46.0) |       | 13,389(45.3)  | 4505 (45.1) |       | 4242 (50.8) | 1417 (50.0) |       |
| Daegu/Gyeongbuk area                          | 6348 (18.5)   | 2132 (18.2) |       | 5593 (18.9)   | 1910 (19.1) |       | 1241 (14.9) | 417 (14.7)  |       |
| Other area                                    | 12,187 (35.5) | 4189 (35.8) |       | 10,596 (35.8) | 3576 (35.8) |       | 2869 (34.4) | 998 (35.2)  |       |
| Resident of a skilled nursing facility, n (%) | 2992(8.7)     | 1044 (8.9)  | 0.008 | 2623 (8.9)    | 897 (9.0)   | 0.004 | 546 (6.5)   | 190 (6.7)   | 0.007 |
| History of diabetes mellitus, n (%)           | 14,130 (41.1) | 4868 (41.6) | 0.010 | 12,395 (41.9) | 4230 (42.3) | 0.010 | 3097 (37.1) | 1058 (37.4) | 0.006 |
| History of cardiovascular disease, n (%)      | 13,323 (38.8) | 4599 (39.3) | 0.012 | 11,460 (38.8) | 3929 (39.3) | 0.013 | 3199 (38.3) | 1096 (38.7) | 0.009 |
| History of cerebrovascular disease, n (%)     | 8089 (23.6)   | 2771 (23.7) | 0.004 | 6994 (23.7)   | 2408 (24.1) | 0.012 | 1634 (19.6) | 566 (20.0)  | 0.012 |
| History of COPD, n (%)                        | 7838 (22.8)   | 2796 (23.9) | 0.029 | 6793 (23.0)   | 2398 (24.0) | 0.028 | 1871 (22.4) | 651 (23.0)  | 0.016 |
| History of hypertension, n (%)                | 19,649 (57.2) | 6676 (57.1) | 0.003 | 17,188 (58.1) | 5782 (57.9) | 0.005 | 4314 (51.7) | 1469 (51.9) | 0.005 |
| History of chronic kidney disease, n (%)      | 6377 (18.6)   | 2266 (19.4) | 0.024 | 5255 (17.8)   | 1876 (18.8) | 0.030 | 1769 (21.2) | 624 (22.0)  | 0.024 |
| Current use of aspirin, n (%)                 | 4892 (14.2)   | 1707 (14.6) | 0.011 | 4288 (14.5)   | 1480 (14.8) | 0.010 | 1048 (12.6) | 380 (13.4)  | 0.028 |
| Current use of metformin, n (%)               | 5049 (14.7)   | 1731 (14.8) | 0.003 | 4481 (15.2)   | 1538 (15.4) | 0.008 | 920 (11.0)  | 315 (11.1)  | 0.004 |

|                                 |               |                         |       |              |                         |       |             |                         |       |
|---------------------------------|---------------|-------------------------|-------|--------------|-------------------------|-------|-------------|-------------------------|-------|
| Current use of statin, n (%)    | 12,459 (36.3) | 4264 (36.5)             | 0.004 | 10,967(37.1) | 3733 (37.4)             | 0.006 | 2577 (30.9) | 868 (30.7)              | 0.005 |
| COVID-19, n (%)                 | 1345 (3.9)    | 527 (4.5)               |       | 1156 (3.9)   | 457 (4.6)               |       | 298 (3.6)   | 127 (4.5)               |       |
| Minimally aOR* (95% CI)         | 1.0 (ref)     | <b>1.16 (1.02-1.31)</b> |       | 1.0 (ref)    | <b>1.18 (1.06-1.32)</b> |       | 1.0 (ref)   | <b>1.26 (1.03-1.57)</b> |       |
| Fully aOR <sup>§</sup> (95% CI) | 1.0 (ref)     | <b>1.21 (1.06-1.39)</b> |       | 1.0 (ref)    | <b>1.22 (1.09-1.38)</b> |       | 1.0 (ref)   | <b>1.28 (1.03-1.61)</b> |       |
| Severe COVID-19‡, n (%)         | 391 (1.1)     | 165 (1.4)               |       | 349 (1.2)    | 144 (1.4)               |       | 85 (1.0)    | 44 (1.6)                |       |
| Minimally aOR* (95% CI)         | 1.0 (ref)     | <b>1.21 (1.02-1.45)</b> |       | 1.0 (ref)    | <b>1.22 (1.01-1.49)</b> |       | 1.0 (ref)   | <b>1.54 (1.07-2.21)</b> |       |
| Fully aOR <sup>§</sup> (95% CI) | 1.0 (ref)     | <b>1.24 (1.04-1.49)</b> |       | 1.0 (ref)    | <b>1.23 (1.02-1.50)</b> |       | 1.0 (ref)   | <b>1.55 (1.08-2.22)</b> |       |
| COVID-19-related death, n (%)   | 55 (0.2)      | 30 (0.3)                |       | 45 (0.2)     | 27 (0.3)                |       | 13 (0.2)    | 9 (0.3)                 |       |
| Minimally aOR* (95% CI)         | 1.0 (ref)     | <b>1.62 (1.03-2.51)</b> |       | 1.0 (ref)    | <b>1.79 (1.10-2.88)</b> |       | 1.0 (ref)   | 2.05 (0.89-4.80)        |       |
| Fully aOR <sup>§</sup> (95% CI) | 1.0 (ref)     | <b>1.62 (1.03-2.53)</b> |       | 1.0 (ref)    | <b>1.80 (1.10-2.89)</b> |       | 1.0 (ref)   | 2.06 (0.89-4.83)        |       |

An SMD <0.1 indicates no major imbalance. All SMD values were <0.03 in the propensity score-matched cohorts.

Data in bold indicate significant differences ( $P < 0.05$ ).

aOR, adjusted odds ratio; AIRD, autoimmune inflammatory rheumatic disease; CI, confidence interval; COPD, chronic obstructive pulmonary disease; CTD, connective tissue disease; DMARD, disease-modifying antirheumatic drug; IA, inflammatory arthritis; SARS-CoV-2, severe acute respiratory syndrome coronavirus 2; SD, standard deviation; SMD, standardized mean difference.

\*Minimally adjusted: adjustment for age (20-39, 40-59, and  $\geq 60$  years) and sex.

§Fully adjusted: adjustment for age; sex; region of residence (Seoul Capital Area, Daegu/Gyeongbuk area, and other area); resident of a skilled nursing facility; history of diabetes mellitus, cardiovascular disease, cerebrovascular disease, COPD, hypertension, and chronic kidney disease; and current use of aspirin, metformin, and statin

‡ Requirement of oxygen therapy, admission to the intensive care unit, invasive ventilation, or death.

\*\* Includes 1125 patients who had both inflammatory arthritis and connective tissue disease.

**Table S4.** Propensity-score-matched subgroup analysis of aOR (95% CI) of positive SARS-CoV-2 test, severe COVID-19 outcomes, or COVID-19-related death in patients with AIRD stratified by DMARD and systemic steroid (matched cohort D).

| Events                 | Factors                                           | N (%)          | Adjusted OR (95% CI)    |
|------------------------|---------------------------------------------------|----------------|-------------------------|
| COVID-19               | Treated without DMARD                             | 210/4444 (4.7) | 1.0 (ref)*              |
|                        | Treated with DMARD                                | 317/7254 (4.4) | 0.91 (0.72-1.17)        |
| COVID-19               | Treated without systemic steroid                  | 382/8901 (4.3) | 1.0 (ref)‡              |
|                        | Treated with systemic steroid (any dose)          | 145/2797 (5.2) | 1.21 (0.93-1.57)        |
|                        | Treated with systemic steroid ( $\geq 10$ mg/day) | 58/920 (6.3)   | <b>1.50 (1.05-2.15)</b> |
| Severe COVID-19§       | Treated without DMARD                             | 60/4444 (1.4)  | 1.0 (ref)*              |
|                        | Treated with DMARD                                | 105/7254 (1.5) | 1.10 (0.77-1.57)*\      |
| Severe COVID-19§       | Treated without systemic steroid                  | 116/8901 (1.3) | 1.0 (ref)‡              |
|                        | Treated with systemic steroid (any dose)          | 49/2797 (1.8)  | 1.34 (0.90-1.91)        |
|                        | Treated with systemic steroid ( $\geq 10$ mg/day) | 23/920 (2.5)   | <b>1.95 (1.13-3.35)</b> |
| COVID-19-related death | Treated without DMARD                             | 10/4444 (2.3)  | 1.0 (ref)*              |
|                        | Treated with DMARD                                | 20/7254 (2.8)  | 1.24 (0.59-2.65)        |

|                        |                                                   |               |                         |
|------------------------|---------------------------------------------------|---------------|-------------------------|
| COVID-19-related death | Treated without systemic steroid                  | 18/8901 (0.2) | 1.0 (ref) <sup>‡</sup>  |
|                        | Treated with systemic steroid (any dose)          | 12/2797 (0.4) | 2.14 (0.99-4.50)        |
|                        | Treated with systemic steroid ( $\geq 10$ mg/day) | 6/920 (0.7)   | <b>3.26 (1.20-8.28)</b> |

---

Data in bold indicate significant differences ( $P < 0.05$ ).

aOR, adjusted odds ratio; AIRD, autoimmune inflammatory rheumatic disease; CI, confidence interval; COPD, chronic obstructive pulmonary disease; DMARD, disease-modifying antirheumatic drug; SARS-CoV-2, severe acute respiratory syndrome coronavirus 2.

\*Risk factors were adjusted for age (20-39, 40-59, and  $\geq 60$  years); sex; region of residence (Seoul Capital Area, Daegu/Gyeongbuk area, and other area); resident of a skilled nursing facility; history of diabetes mellitus, cardiovascular disease, cerebrovascular disease, COPD, hypertension, and chronic kidney disease; and current use of aspirin, metformin, statin, and systemic steroid.

<sup>‡</sup>Risk factors were adjusted for age (20-39, 40-59, and  $\geq 60$  years); sex; region of residence (Seoul Capital Area, Daegu/Gyeongbuk area, and other area); resident of a skilled nursing facility; history of diabetes mellitus, cardiovascular disease, cerebrovascular disease, COPD, hypertension, and chronic kidney disease; and current use of aspirin, metformin, and statin and DMARD.

<sup>§</sup> Requirement of oxygen therapy, admission to the intensive care unit, invasive ventilation, or death.

**Table S5.** 3:1 propensity score-matched covariates selected by DAGs and aOR (95% CI) of positive SARS-CoV-2 test, severe COVID-19 outcomes, or COVID-19-related death in patients with AIRD, IA, or CTD in the Korean nationwide cohort linked with the general health examination records.

| Characteristics                     | Matched cohort G |             |       | Matched cohort H |             |        | Matched cohort I |            |        |
|-------------------------------------|------------------|-------------|-------|------------------|-------------|--------|------------------|------------|--------|
|                                     | None             | AIRD        | SMD   | None             | IA          | SMD    | None             | CTD        | SMD    |
| Total, n (%)                        | 24,782           | 8286        |       | 21,342           | 7132        |        | 5854             | 1952       |        |
| Matched covariates selected by DAGs |                  |             |       |                  |             |        |                  |            |        |
| Age, years, n (%)                   |                  |             | 0.001 |                  |             | <0.001 |                  |            | 0.003  |
| 20-39                               | 2341 (9.45)      | 782 (9.4)   |       | 1865 (8.8)       | 622 (8.7)   |        | 771(13.2)        | 255 (13.1) |        |
| 40-59                               | 7775 (31.4)      | 2592 (31.3) |       | 6607 (31.0)      | 2206 (30.9) |        | 2155 (36.8)      | 719 (36.8) |        |
| ≥ 60                                | 14,666 (59.2)    | 4912 (59.3) |       | 12,870 (60.3)    | 4304 (60.4) |        | 2928 (50.0)      | 978 (50.1) |        |
| Sex, n (%)                          |                  |             | 0.002 |                  |             | 0.001  |                  |            | <0.001 |
| Male                                | 9130 (36.8)      | 3044 (36.7) |       | 7848 (36.8)      | 2618 (36.7) |        | 1875 (32.0)      | 625 (32.0) |        |



|                                               |               |             |       |               |             |        |             |             |
|-----------------------------------------------|---------------|-------------|-------|---------------|-------------|--------|-------------|-------------|
| Female                                        | 15,652 (63.2) | 5242 (63.3) |       | 13,494 (63.2) | 4514 (63.3) |        | 3979 (68.0) | 1327 (68.0) |
| Region of residence, n (%)                    |               |             | 0.001 |               |             | <0.001 |             | 0.002       |
| Seoul Capital Area                            | 10,888 (43.9) | 3640 (43.9) |       | 9204 (43.1)   | 3071 (43.1) |        | 2790 (47.7) | 927 (47.5)  |
| Daegu/Gyeongbuk area                          | 4811 (19.4)   | 1617 (19.5) |       | 4347 (20.4)   | 1462 (20.5) |        | 918 (15.7)  | 310 (15.9)  |
| Other area                                    | 9083 (36.7)   | 3029 (36.6) |       | 7791 (36.5)   | 2599 (36.4) |        | 2146 (36.7) | 715 (36.6)  |
| Resident of a skilled nursing facility, n (%) | 1775 (7.2)    | 601 (7.3)   | 0.003 | 1498 (7.0)    | 515(7.2)    | 0.008  | 345 (5.9)   | 116 (5.9)   |
| Household income, n (%)                       |               |             | 0.002 |               |             |        |             | <0.001      |
| Low (0–39 percentile)                         | 8854 (35.7)   | 2973 (35.9) |       | 7644 (35.8)   | 2569 (36.0) |        | 2054 (35.1) | 685 (35.1)  |
| Middle (40–79 percentile)                     | 8547 (34.5)   | 2848 (34.4) |       | 7383 (34.6)   | 2460 (34.5) |        | 2017 (34.5) | 673 (34.5)  |
| High (80–100 percentile)                      | 7381 (29.8)   | 2465 (29.8) |       | 6315 (29.6)   | 2103 (29.5) |        | 1783 (30.5) | 594 (30.4)  |
| Smoking, n (%)                                |               |             | 0.002 |               |             | 0.003  |             | 0.003       |
| Never smoker                                  | 17,840 (72.0) | 5953 (71.8) |       | 15,378 (72.1) | 5129 (71.9) |        | 4408 (75.3) | 1468 (75.2) |

|                                            |               |             |               |             |             |             |
|--------------------------------------------|---------------|-------------|---------------|-------------|-------------|-------------|
| Ex-smoker                                  | 3964 (16.0)   | 1336 (16.1) | 3361 (15.8)   | 1128 (15.8) | 895 (15.3)  | 298 (15.3)  |
| Current smoker                             | 2978 (12.0)   | 997 (12.0)  | 2603 (12.2)   | 875 (12.3)  | 551 (9.4)   | 186 (9.5)   |
| Alcoholic drinks, days per week, n (%)     |               |             | 0.005         |             | 0.004       | 0.001       |
| <1                                         | 18,989 (76.6) | 6341 (76.5) | 16,463 (77.1) | 5502 (77.2) | 4457 (76.1) | 1485 (76.1) |
| 1–2                                        | 4487 (18.1)   | 1494 (18.0) | 3738 (17.5)   | 1239 (17.4) | 1147 (19.6) | 383 (19.6)  |
| 3–4                                        | 890 (3.6)     | 304 (3.7)   | 761 (3.6)     | 257 (3.6)   | 183 (3.1)   | 62 (3.2)    |
| ≥5                                         | 416 (1.7)     | 147 (1.8)   | 380 (1.8)     | 134 (1.9)   | 67 (1.1)    | 22 (1.1)    |
| Body mass index, kg/m <sup>2</sup> , n (%) |               |             | 0.006         |             | 0.009       | 0.006       |
| <25                                        | 15,886 (64.1) | 5297 (63.9) | 13,553 (63.5) | 4507 (63.2) | 4131 (70.6) | 1373 (70.3) |
| 25–30                                      | 7444 (30.0)   | 2490 (30.1) | 6527 (30.6)   | 2186 (30.7) | 1466 (25.0) | 491 (25.2)  |
| ≥30                                        | 1452 (5.9)    | 499 (6.0)   | 1262 (5.9)    | 439 (6.2)   | 257 (4.4)   | 88 (4.5)    |
| Unmatched covariates                       |               |             |               |             |             |             |

|                                           |               |                         |               |                         |             |                         |
|-------------------------------------------|---------------|-------------------------|---------------|-------------------------|-------------|-------------------------|
| History of diabetes mellitus, n (%)       | 7401 (29.9)   | 3434 (41.4)             | 6528 (30.6)   | 3001 (42.1)             | 1526 (26.1) | 751 (38.5)              |
| History of cardiovascular disease, n (%)  | 6570 (26.5)   | 3130 (37.8)             | 5725 (26.8)   | 2677 (37.5)             | 1392(23.8)  | 743 (38.1)              |
| History of cerebrovascular disease, n (%) | 4318 (17.4)   | 1878 (22.7)             | 3830 (18.0)   | 1636 (22.9)             | 924 (15.8)  | 392 (20.1)              |
| History of COPD, n (%)                    | 3974 (16.0)   | 2000 (24.1)             | 3523 (16.5)   | 1710 (24.0)             | 839 (14.3)  | 481 (24.6)              |
| History of hypertension, n (%)            | 11,671 (47.1) | 4649 (56.1)             | 10,117 (47.4) | 4041 (56.7)             | 2390 (40.8) | 1014 (52.0)             |
| History of chronic kidney disease, n (%)  | 2736 (11.0)   | 1472 (17.8)             | 2343 (11.0)   | 1236 (17.3)             | 590 (10.1)  | 399 (20.4)              |
| Current use of aspirin, n (%)             | 3185 (12.9)   | 1209 (14.6)             | 2738 (12.8)   | 1044 (14.6)             | 652 (11.1)  | 282 (14.5)              |
| Current use of metformin, n (%)           | 3506 (14.2)   | 1256 (15.2)             | 3100 (14.5)   | 1114 (15.6)             | 692 (11.8)  | 234 (12.0)              |
| Current use of statin, n (%)              | 8044 (32.5)   | 3223 (38.9)             | 7057 (33.1)   | 2833 (39.7)             | 1593 (27.2) | 658 (33.7)              |
| Sufficient aerobic activity, n (%)        | 11,934 (48.2) | 4096 (49.4)             | 10,238 (48.0) | 3521 (49.4)             | 2829 (48.3) | 983 (50.4)              |
| COVID-19, n (%)                           | 1024 (3.7)    | 365 (4.4)               | 816 (3.8)     | 327 (4.6)               | 191 (3.3)   | 84 (4.3)                |
| Fully aOR <sup>s</sup> (95% CI)           | 1.0 (ref)     | <b>1.21 (1.07-1.38)</b> | 1.0 (ref)     | <b>1.21 (1.06-1.39)</b> | 1.0 (ref)   | <b>1.35 (1.04-1.76)</b> |
| Severe COVID-19 <sup>‡</sup> , n (%)      | 315 (1.1)     | 127 (1.5)               | 240 (1.1)     | 103 (1.4)               | 51 (0.9)    | 30 (1.5)                |

|                                 |           |                         |           |                         |           |                         |
|---------------------------------|-----------|-------------------------|-----------|-------------------------|-----------|-------------------------|
| Fully aOR <sup>§</sup> (95% CI) | 1.0 (ref) | <b>1.38 (1.12-1.68)</b> | 1.0 (ref) | <b>1.30 (1.03-1.65)</b> | 1.0 (ref) | <b>1.78 (1.14-2.82)</b> |
| COVID-19-related death, n (%)   | 46 (0.2)  | 24 (0.3)                | 32 (0.2)  | 20 (0.3)                | 11 (0.2)  | 7 (0.4)                 |
| Fully aOR <sup>§</sup> (95% CI) | 1.0 (ref) | <b>1.77 (1.06-2.90)</b> | 1.0 (ref) | <b>1.89 (1.06-3.34)</b> | 1.0 (ref) | 1.93 (0.72-4.96)        |

---

An SMD <0.1 indicates no major imbalance. All SMD values were <0.01 in the propensity score-matched cohort.

Data in bold indicate significant differences ( $P < 0.05$ ).

aOR, adjusted odds ratio; AIRD, autoimmune inflammatory rheumatic disease; CI, confidence interval; COPD, chronic obstructive pulmonary disease; CTD, connective tissue disease; DAGs, directed acyclic graphs; DMARD, disease-modifying antirheumatic drug; IA, inflammatory arthritis; SARS-CoV-2, severe acute respiratory syndrome coronavirus 2; SD, standard deviation; SMD, standardized mean difference.

\*Minimally adjusted: adjustment for age (20-39, 40-59, and  $\geq 60$  years) and sex.

§Fully adjusted: adjustment for age; sex; region of residence (Seoul Capital Area, Daegu/Gyeongbuk area, and other area); resident of a skilled nursing facility; history of diabetes mellitus, cardiovascular disease, cerebrovascular disease, COPD, hypertension, and chronic kidney disease; household income (low, middle, and high); smoking (never, ex-, and current); alcoholic drinks (<1, 1-2, 3-4,  $\geq 5$  days per week);

body mass index (< 25, 25-30, and  $\geq 30$  kg/m<sup>2</sup>); sufficient aerobic activity; and current use of aspirin, metformin, and statin

‡ Requirement of oxygen therapy, admission to the intensive care unit, invasive ventilation, or death.

**Table S6.** 3:1 propensity score-matched covariates selected by DAGs and aOR (95% CI) of positive SARS-CoV-2 test, severe COVID-19 outcomes, or COVID-19-related death in patients with AIRD, IA, or CTD in the Korean nationwide cohort.

| Characteristics                     | Matched cohort J |             |        | Matched cohort K |             |        | Matched cohort L |             |        |
|-------------------------------------|------------------|-------------|--------|------------------|-------------|--------|------------------|-------------|--------|
|                                     | None             | AIRD        | SMD    | None             | IA          | SMD    | None             | CTD         | SMD    |
| Total, n (%)                        | 35,298           | 11,766      |        | 30,114           | 10,038      |        | 8625             | 2875        |        |
| Matched covariates selected by DAGs |                  |             |        |                  |             |        |                  |             |        |
| Age, years, n (%)                   |                  |             | <0.001 |                  |             | <0.001 |                  |             | <0.001 |
| 20-39                               | 4770 (13.5)      | 1590(13.5)  |        | 3741 (12.4)      | 1247 (12.4) |        | 1743 (20.2)      | 581 (20.2)  |        |
| 40-59                               | 9909 (28.1)      | 3303(28.1)  |        | 8316 (27.6)      | 2772 (27.6) |        | 2850 (33.0)      | 950 (33.0)  |        |
| ≥ 60                                | 20,619 (58.4)    | 6873(58.41) |        | 18,057 (60.0)    | 6019(60.0)  |        | 4032 (46.8)      | 1344 (46.8) |        |
| Sex, n (%)                          |                  |             | <0.001 |                  |             | <0.001 |                  |             | <0.001 |
| Male                                | 12,852 (36.4)    | 4284 (36.4) |        | 10,941 (36.3)    | 3647 (36.3) |        | 2715 (31.5)      | 905 (31.5)  |        |

|                                               |               |             |        |               |             |        |             |             |        |
|-----------------------------------------------|---------------|-------------|--------|---------------|-------------|--------|-------------|-------------|--------|
| Female                                        | 22,446 (63.6) | 7482 (63.6) |        | 19,173 (63.7) | 6391 (63.7) |        | 5910 (68.5) | 1970 (68.5) |        |
| Region of residence, n (%)                    |               |             | <0.001 |               |             | <0.001 |             |             | <0.001 |
| Seoul Capital Area                            | 16,230 (46.0) | 5410 (46.0) |        | 13,581 (45.1) | 4527 (45.1) |        | 4299 (49.8) | 1433 (49.8) |        |
| Daegu/Gyeongbuk area                          | 6450 (18.3)   | 2150 (18.3) |        | 5775 (19.2)   | 1925 (19.2) |        | 1293 (15.0) | 431 (15.0)  |        |
| Other area                                    | 12,618 (35.8) | 4206 (35.8) |        | 10,758 (35.7) | 3586 (35.7) |        | 3033 (35.2) | 1011 (35.2) |        |
| Resident of a skilled nursing facility, n (%) | 3135 (8.9)    | 1045 (8.9)  | <0.001 | 2694 (9.0)    | 898 (9.0)   | <0.001 | 570 (6.6)   | 190 (6.6)   | <0.001 |
| Unmatched covariates                          |               |             |        |               |             |        |             |             |        |
| History of diabetes mellitus, n (%)           | 10,407 (29.5) | 4890 (41.6) |        | 9082 (30.2)   | 4257 (42.4) |        | 2433 (28.2) | 1072 (37.3) |        |
| History of cardiovascular disease, n (%)      | 9678 (27.4)   | 4640 (39.4) |        | 8494 (28.2)   | 3956 (39.4) |        | 2186 (25.3) | 1126 (39.2) |        |
| History of cerebrovascular disease, n (%)     | 6546 (18.5)   | 2784 (23.7) |        | 5785 (19.2)   | 2420 (24.1) |        | 1508 (17.5) | 586 (20.4)  |        |
| History of COPD, n (%)                        | 5527 (15.7)   | 2841 (24.2) |        | 4877 (16.2)   | 2435 (24.3) |        | 1394 (16.2) | 667 (23.2)  |        |
| History of hypertension, n (%)                | 16,575 (47.0) | 6706 (57.0) |        | 14,494 (48.1) | 5801 (57.8) |        | 3595 (41.7) | 1502 (52.2) |        |
| History of chronic kidney disease, n (%)      | 4186 (11.9)   | 2306 (19.6) |        | 3635 (12.1)   | 1900 (18.9) |        | 1003 (11.6) | 651 (22.6)  |        |

|                                      |               |                         |             |                         |             |                         |
|--------------------------------------|---------------|-------------------------|-------------|-------------------------|-------------|-------------------------|
| Current use of aspirin, n (%)        | 4432 (12.6)   | 1722 (14.6)             | 3917 (13.0) | 1490 (14.8)             | 957 (11.1)  | 398 (13.8)              |
| Current use of metformin, n (%)      | 4612 (13.1)   | 1734 (14.7)             | 4016 (13.3) | 1538 (15.3)             | 1058 (12.3) | 316(11.0)               |
| Current use of statin, n (%)         | 10,380 (29.4) | 4294 (36.5)             | 9092 (30.2) | 3759 (37.5)             | 2266 (26.3) | 891 (31.0)              |
| COVID-19, n (%)                      | 1288 (3.7)    | 530 (4.5)               | 1136 (3.8)  | 457 (4.6)               | 290 (3.4)   | 127 (4.4)               |
| Fully aOR* (95% CI)                  | 1.0 (ref)     | <b>1.20 (1.02-1.38)</b> | 1.0 (ref)   | <b>1.19 (1.02-1.42)</b> | 1.0 (ref)   | <b>1.31 (1.05-1.62)</b> |
| Severe COVID-19 <sup>§</sup> , n (%) | 388 (1.1)     | 168 (1.4)               | 327 (1.1)   | 144 (1.4)               | 79 (0.9)    | 40 (1.4)                |
| Fully aOR* (95% CI)                  | 1.0 (ref)     | <b>1.26 (1.03-1.54)</b> | 1.0 (ref)   | <b>1.35 (1.14-1.62)</b> | 1.0 (ref)   | <b>1.56 (1.08-2.28)</b> |
| COVID-19-related death, n (%)        | 51 (0.1)      | 31 (0.3)                | 42 (0.1)    | 27 (0.3)                | 12 (0.1)    | 9 (0.3)                 |
| Fully aOR* (95% CI)                  | 1.0 (ref)     | <b>1.73 (1.05-2.78)</b> | 1.0 (ref)   | <b>1.90 (1.20-2.99)</b> | 1.0 (ref)   | 2.23 (0.91-5.35)        |

An SMD <0.1 indicates no major imbalance. All SMD values were <0.001 in the propensity score-matched cohort.

Data in bold indicate significant differences ( $P < 0.05$ ).



aOR, adjusted odds ratio; AIRD, autoimmune inflammatory rheumatic disease; CI, confidence interval; COPD, chronic obstructive pulmonary disease; CTD, connective tissue disease; DAGs, directed acyclic graphs; DMARD, disease-modifying antirheumatic drug; IA, inflammatory arthritis; SARS-CoV-2, severe acute respiratory syndrome coronavirus 2; SD, standard deviation; SMD, standardized mean difference.

\*Fully adjusted: adjustment for age (20-39, 40-59, and  $\geq 60$  years); sex; region of residence (Seoul Capital Area, Daegu/Gyeongbuk area, and other area); resident of a skilled nursing facility; history of diabetes mellitus, cardiovascular disease, cerebrovascular disease, COPD, hypertension, and chronic kidney disease; and current use of aspirin, metformin, and statin

§ Requirement of oxygen therapy, admission to the intensive care unit, invasive ventilation, or death.

**Figure S1.** Disposition of patients in the Korean nationwide cohort without linking the general health examination records (matched cohorts D-F)

AIRD, autoimmune inflammatory rheumatic disease; CTD, connective tissue disease; IA, inflammatory arthritis; SARS-CoV-2, severe acute respiratory syndrome coronavirus 2.

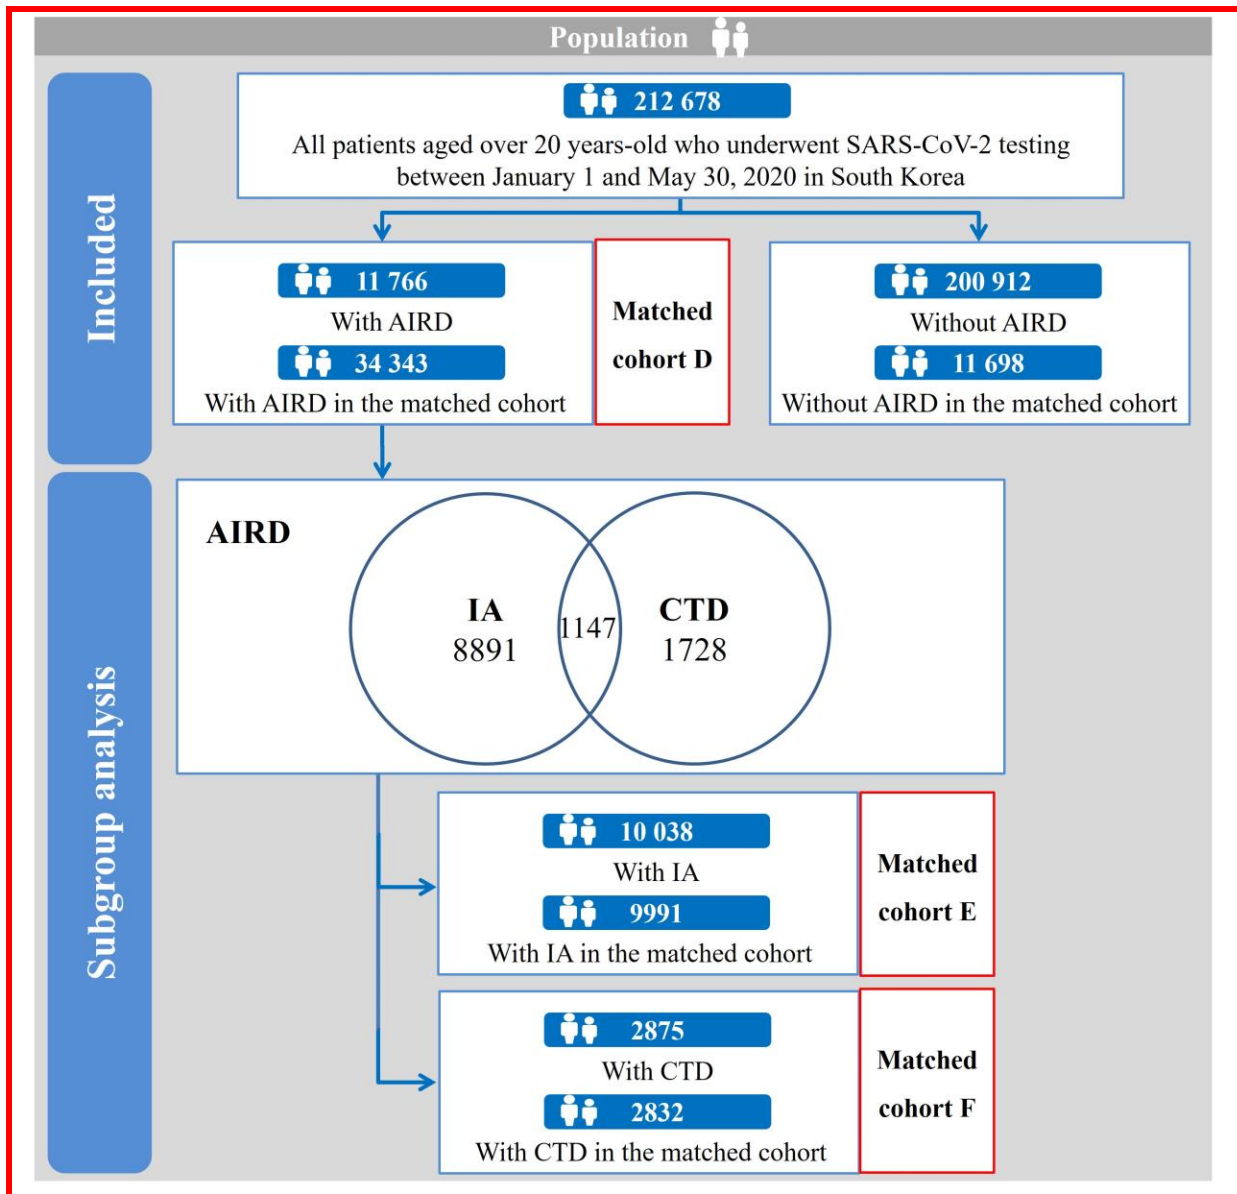

**Figure S2.** Flowchart showing the study enrollment in the Korean nationwide cohort without linking the general health examination records (matched cohorts D-F)

AIRD, autoimmune inflammatory rheumatic disease; CTD, connective tissue disease; IA, inflammatory arthritis; KCDC, Korea Centers for Disease Control; SARS-CoV-2, severe acute respiratory syndrome coronavirus 2.

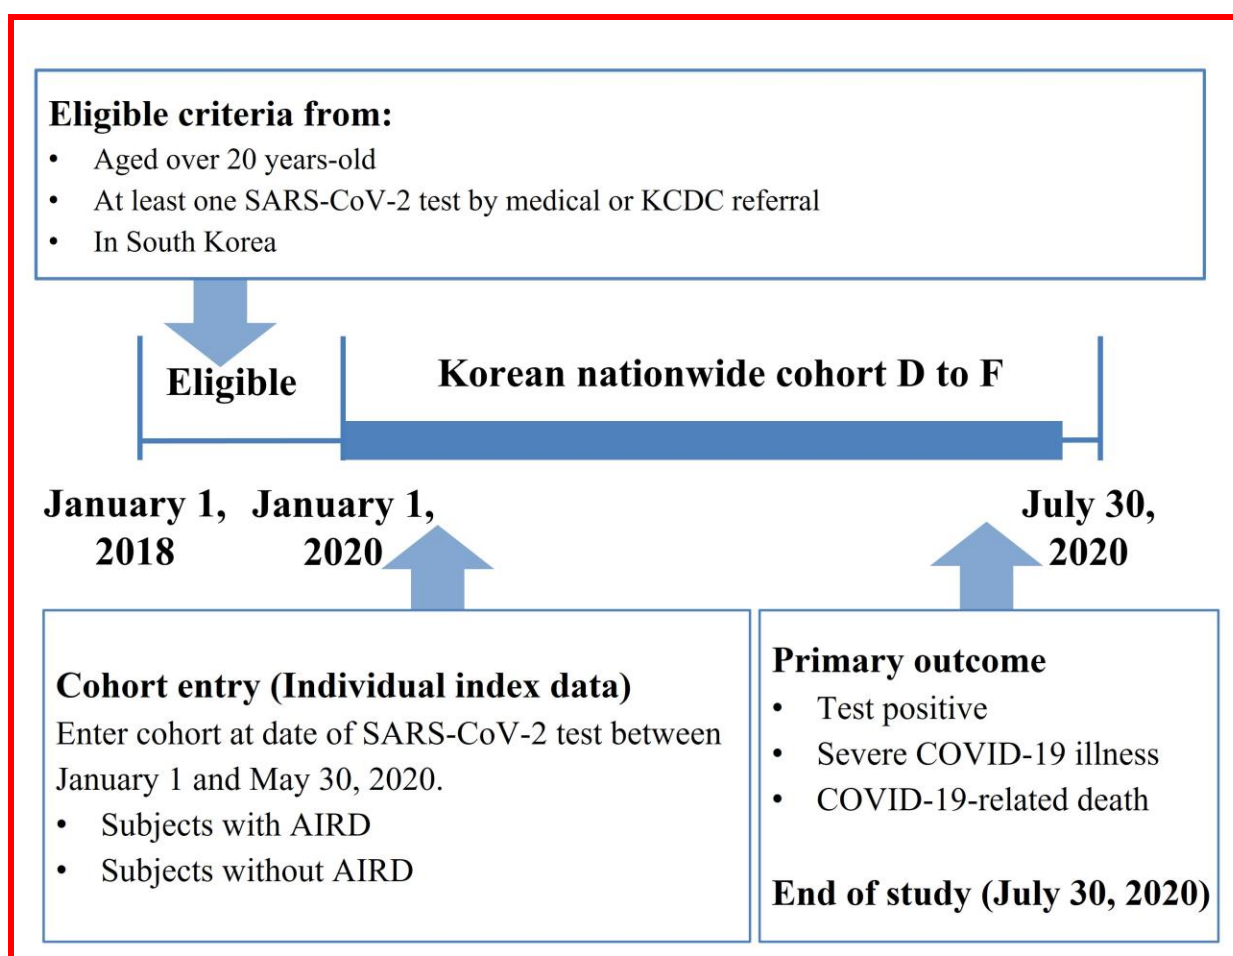

**Figure S3.** The density and distribution of propensity scores before and after matching in matched cohort A

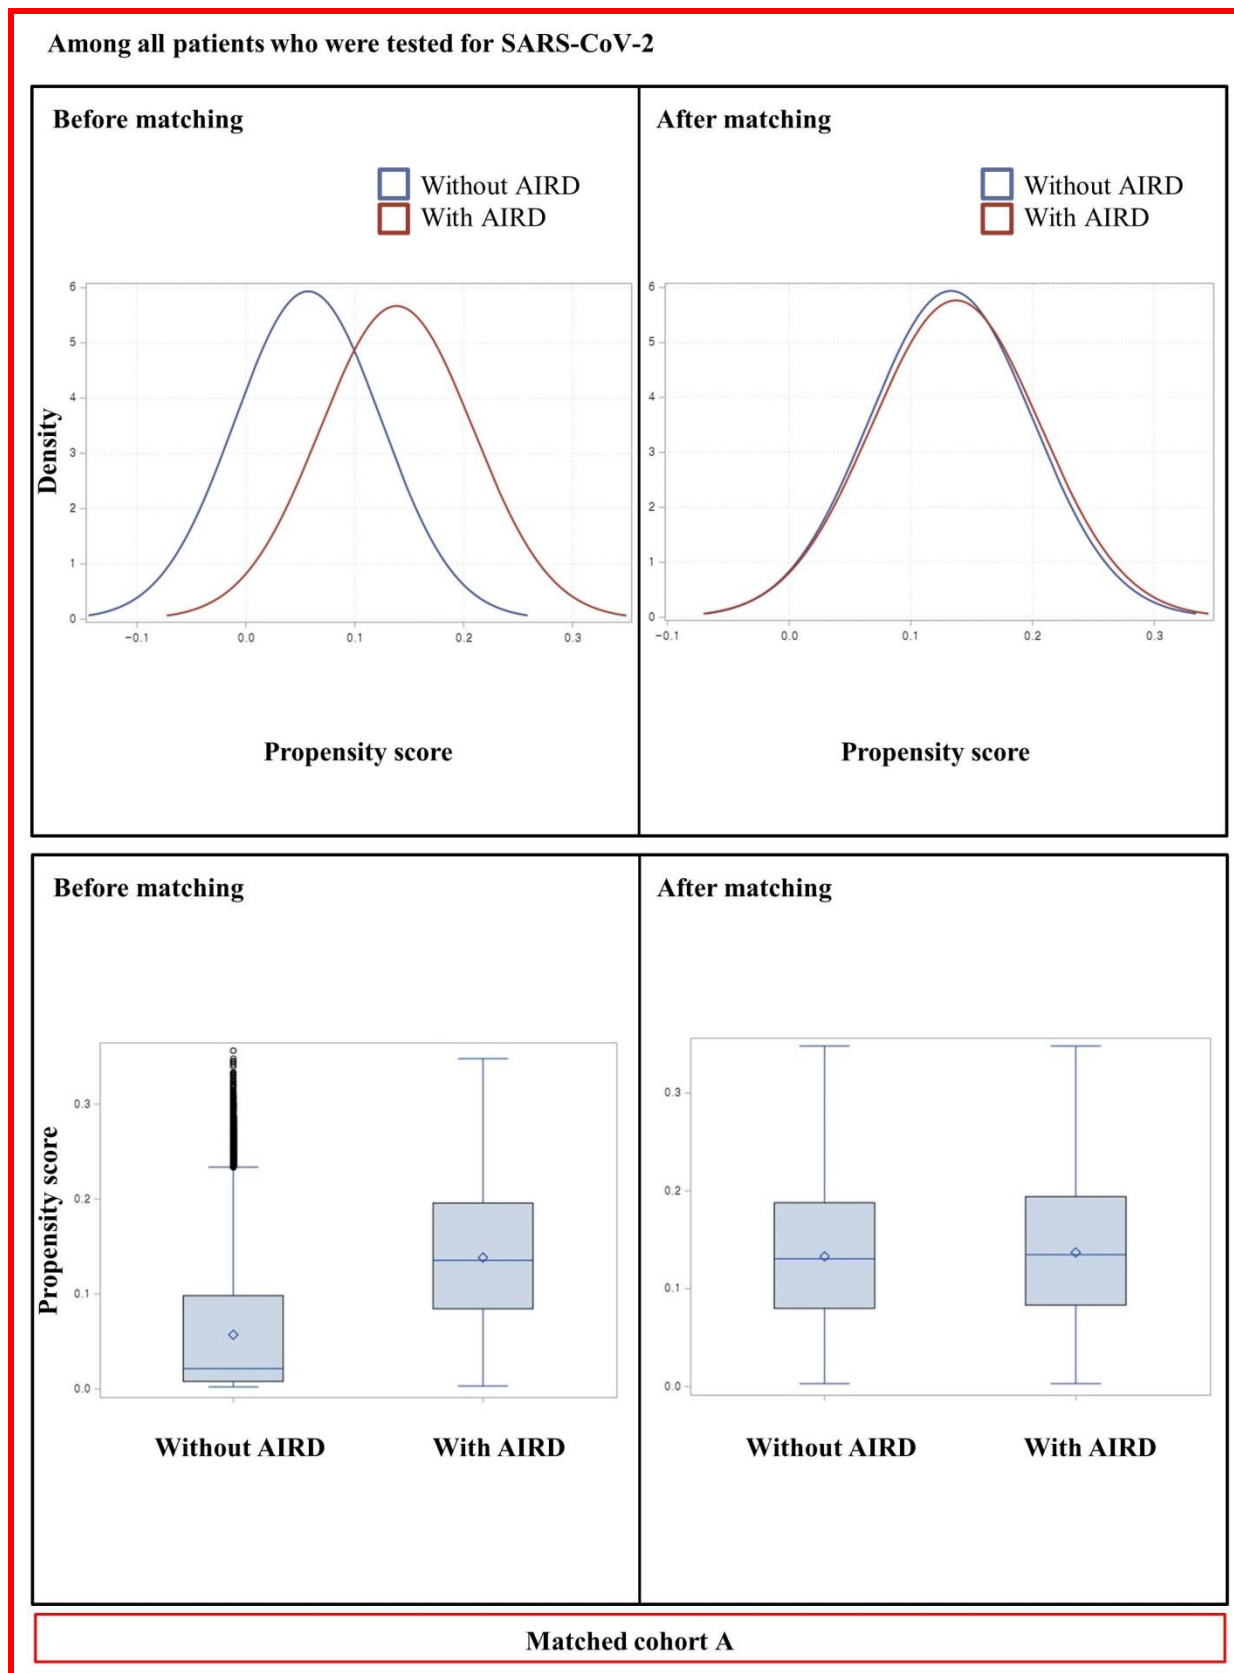

**Figure S4.** The density and distribution of propensity scores before and after matching in matched cohort B

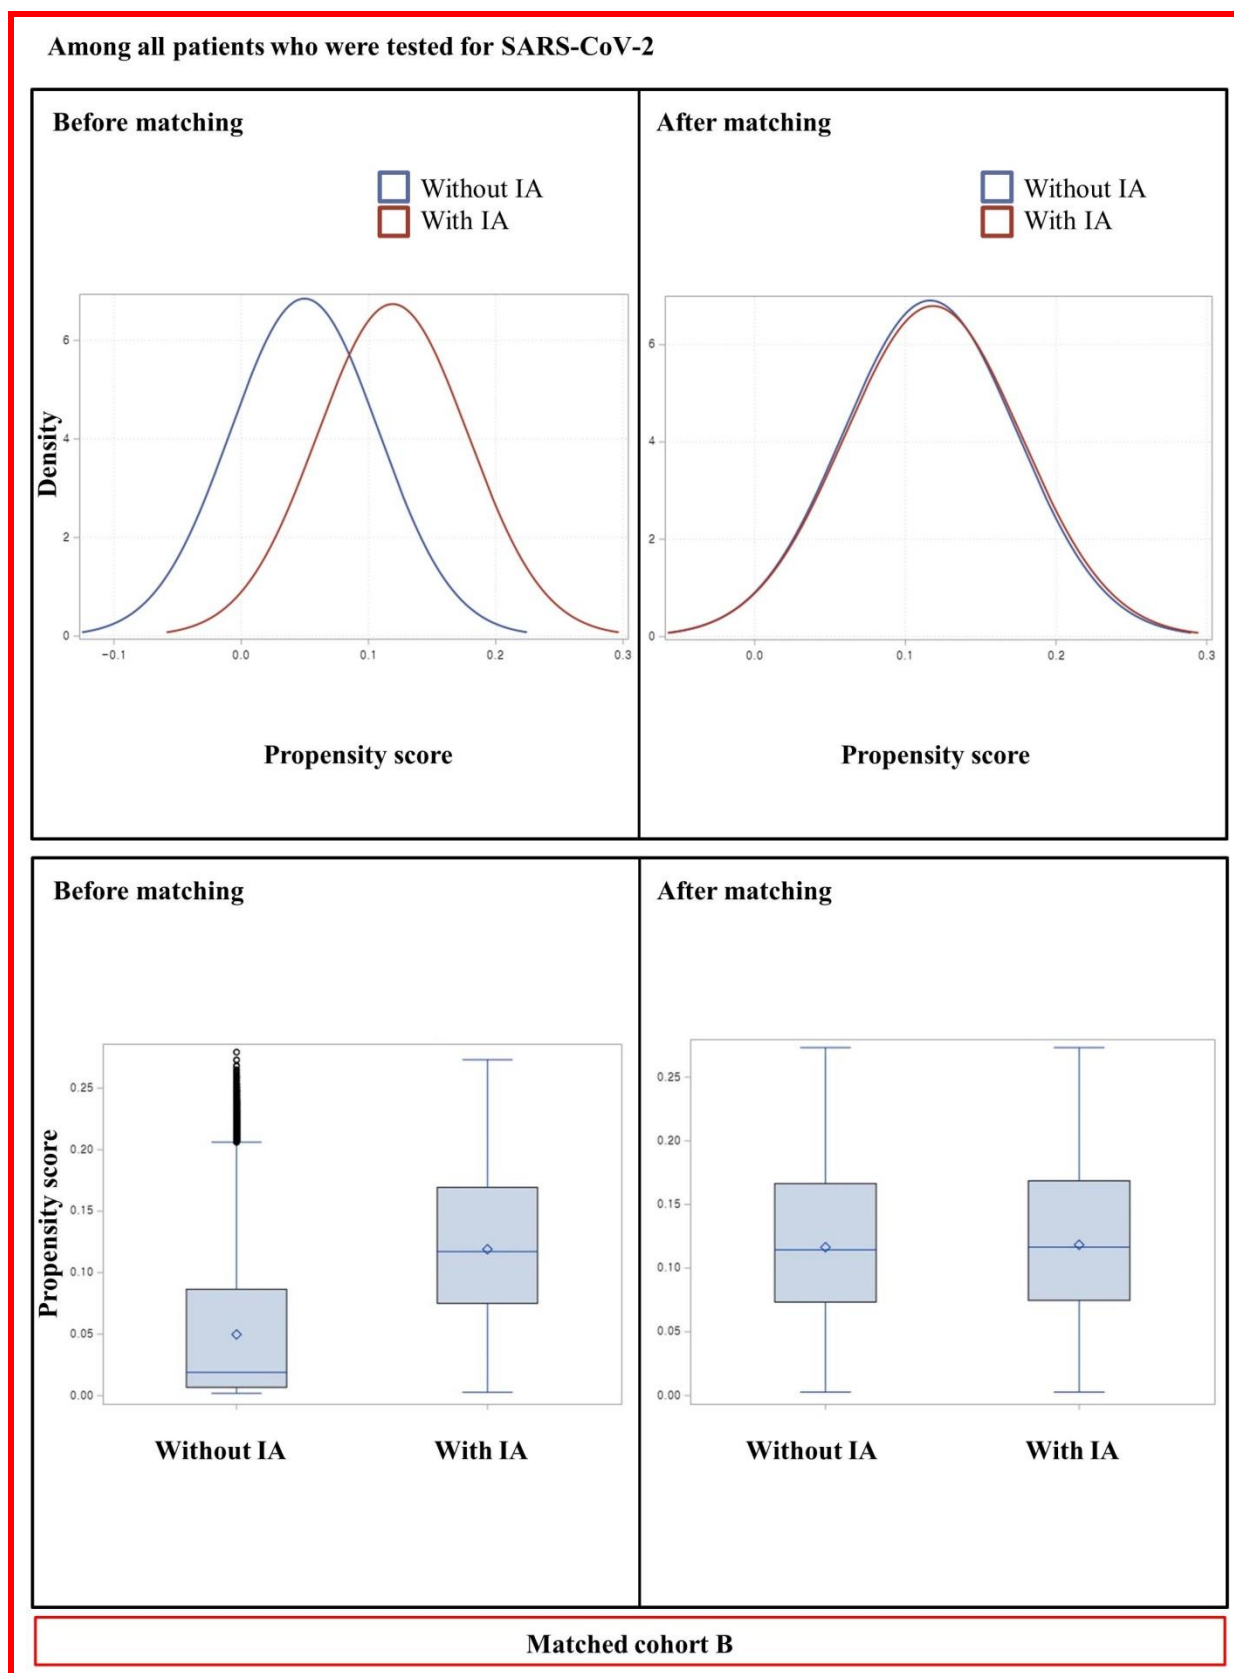

**Figure S5.** The density and distribution of propensity scores before and after matching in matched cohort C

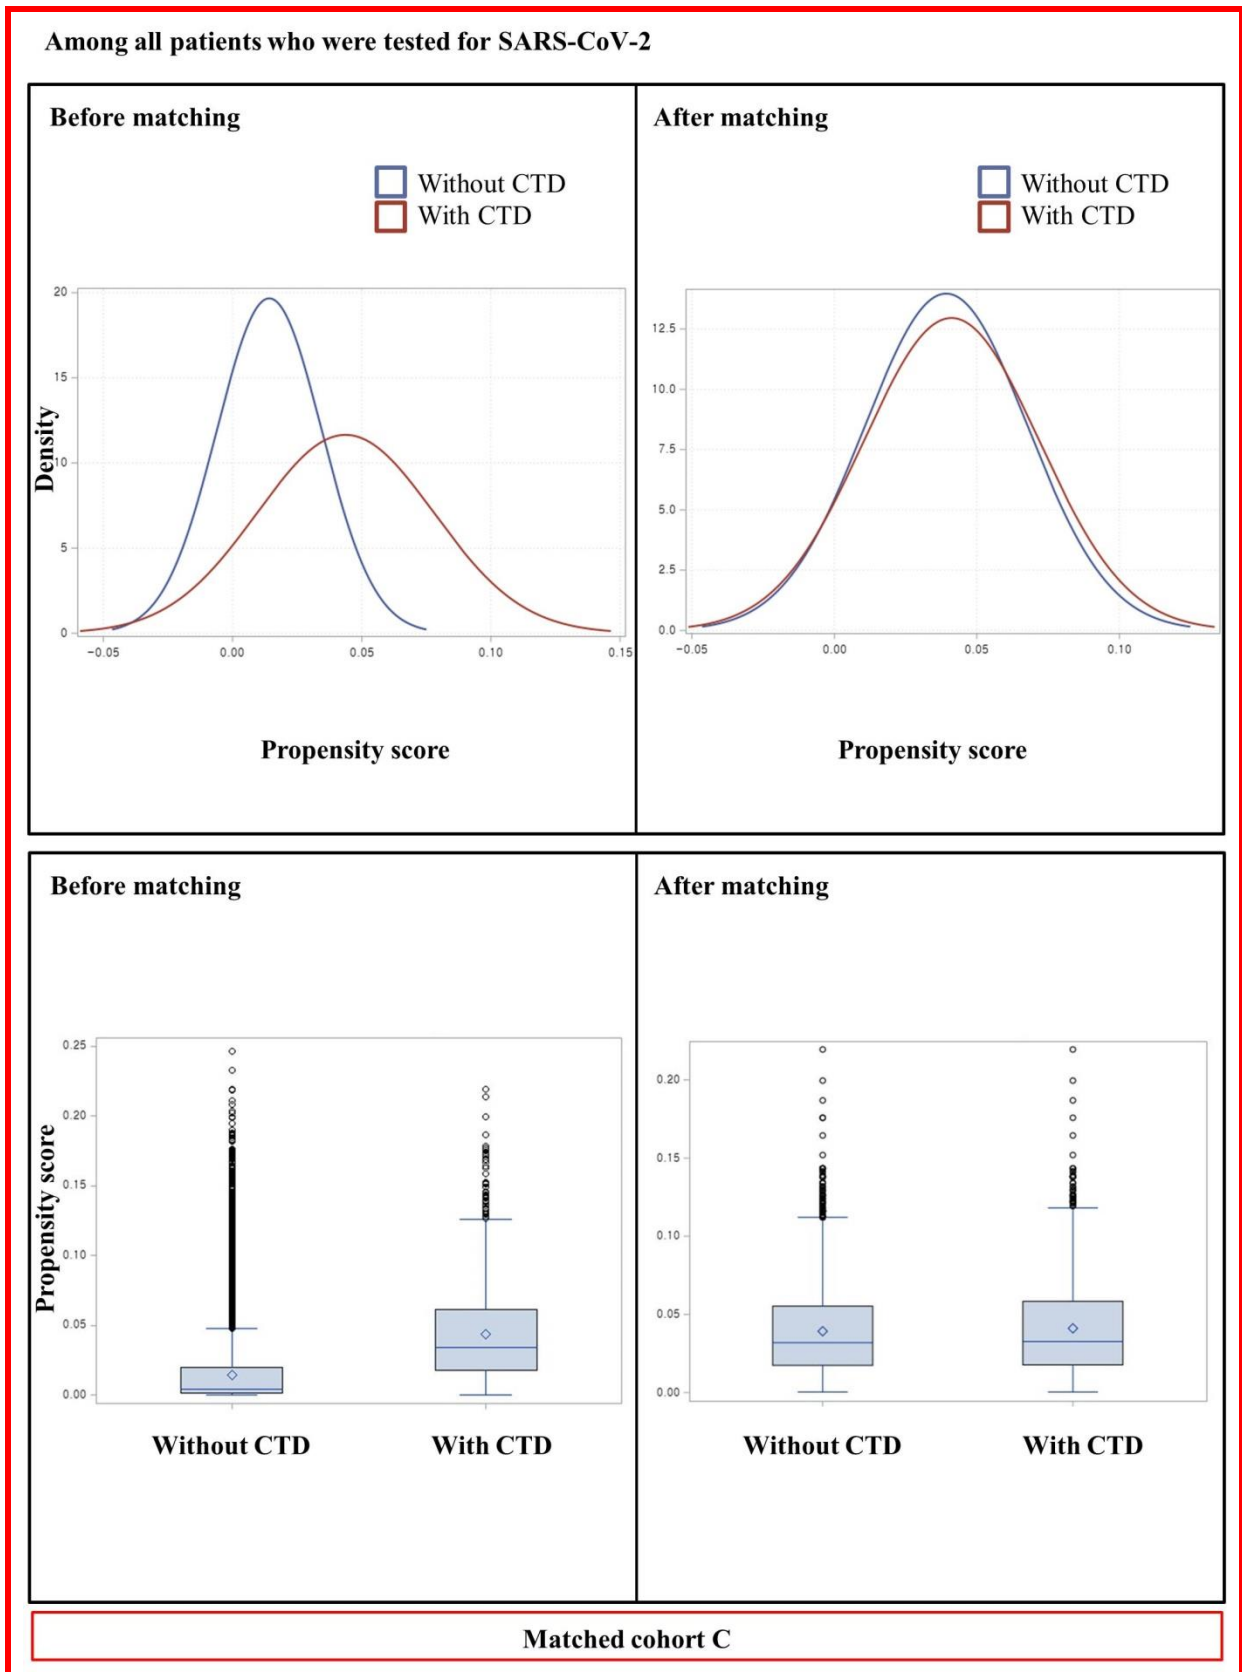

**Figure S6.** The density and distribution of propensity scores before and after matching in matched cohort D

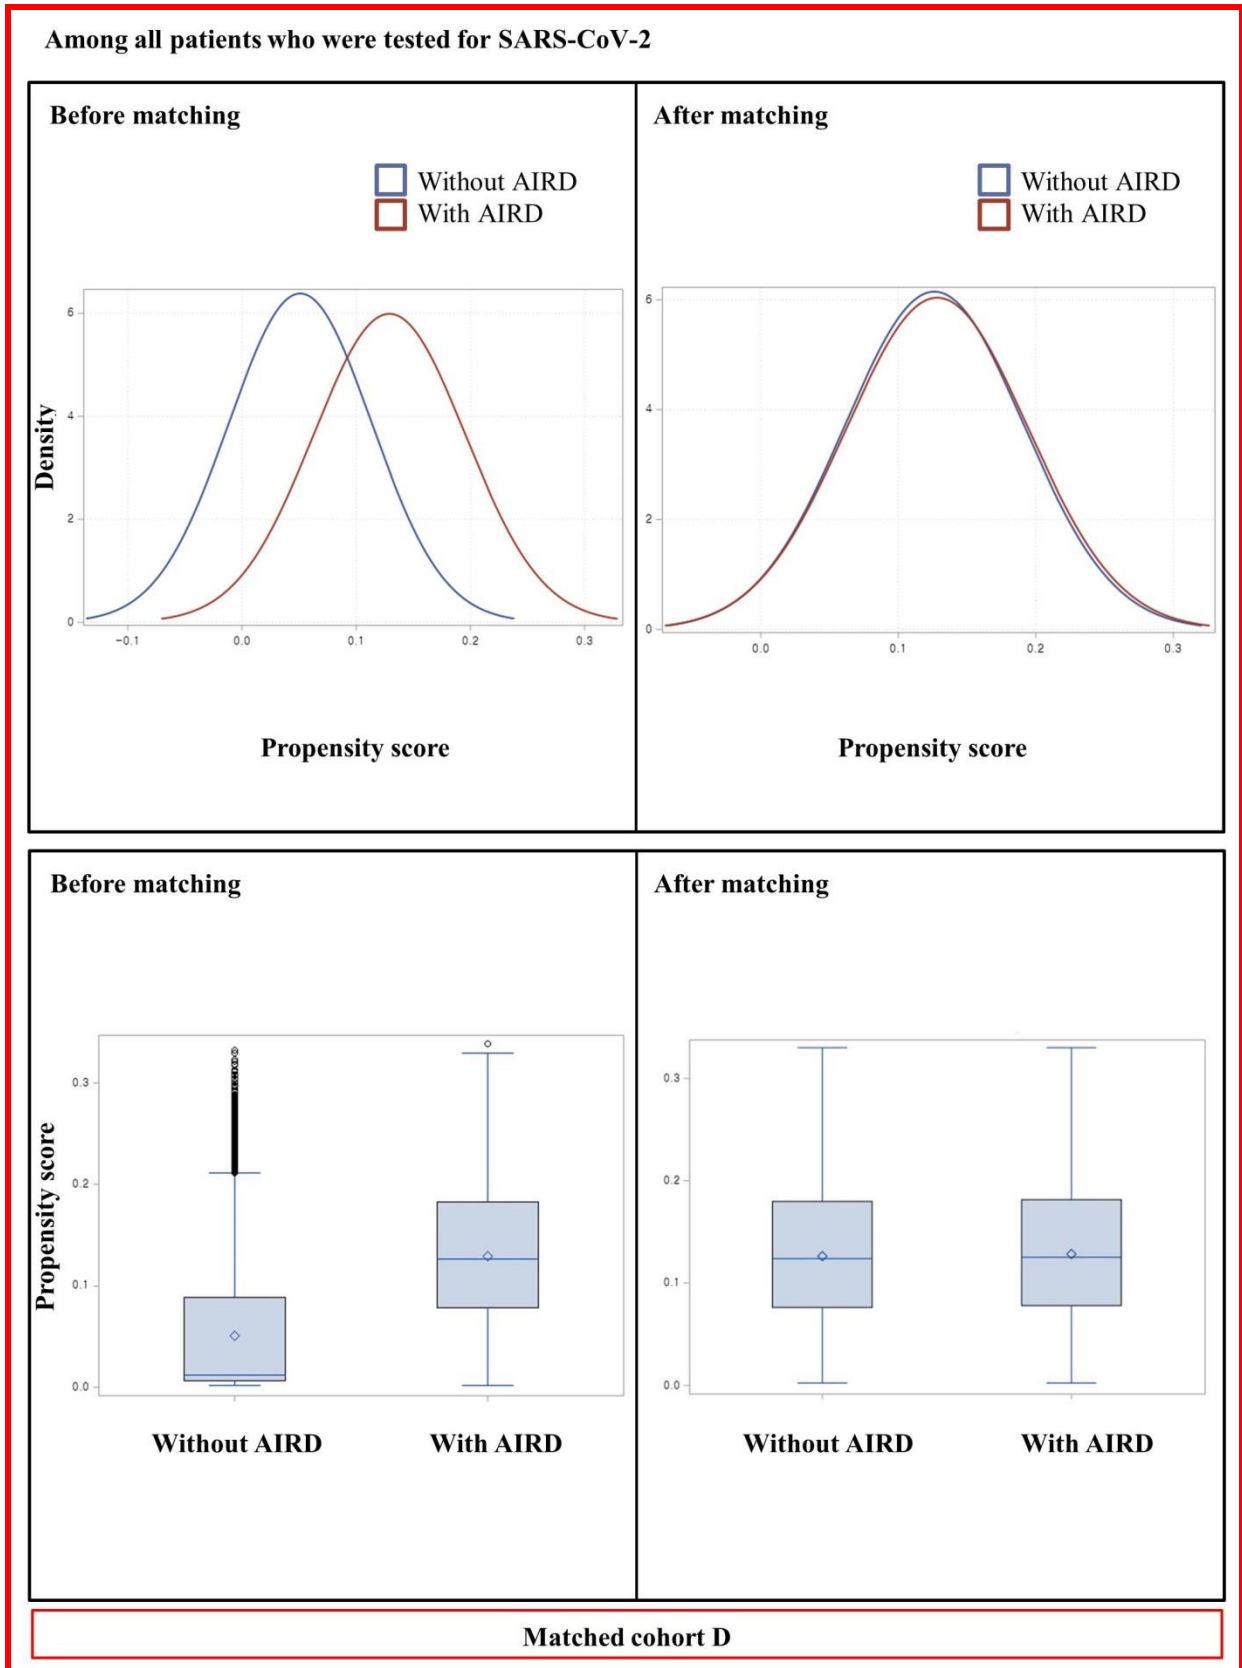

**Figure S7.** The density and distribution of propensity scores before and after matching in matched cohort E

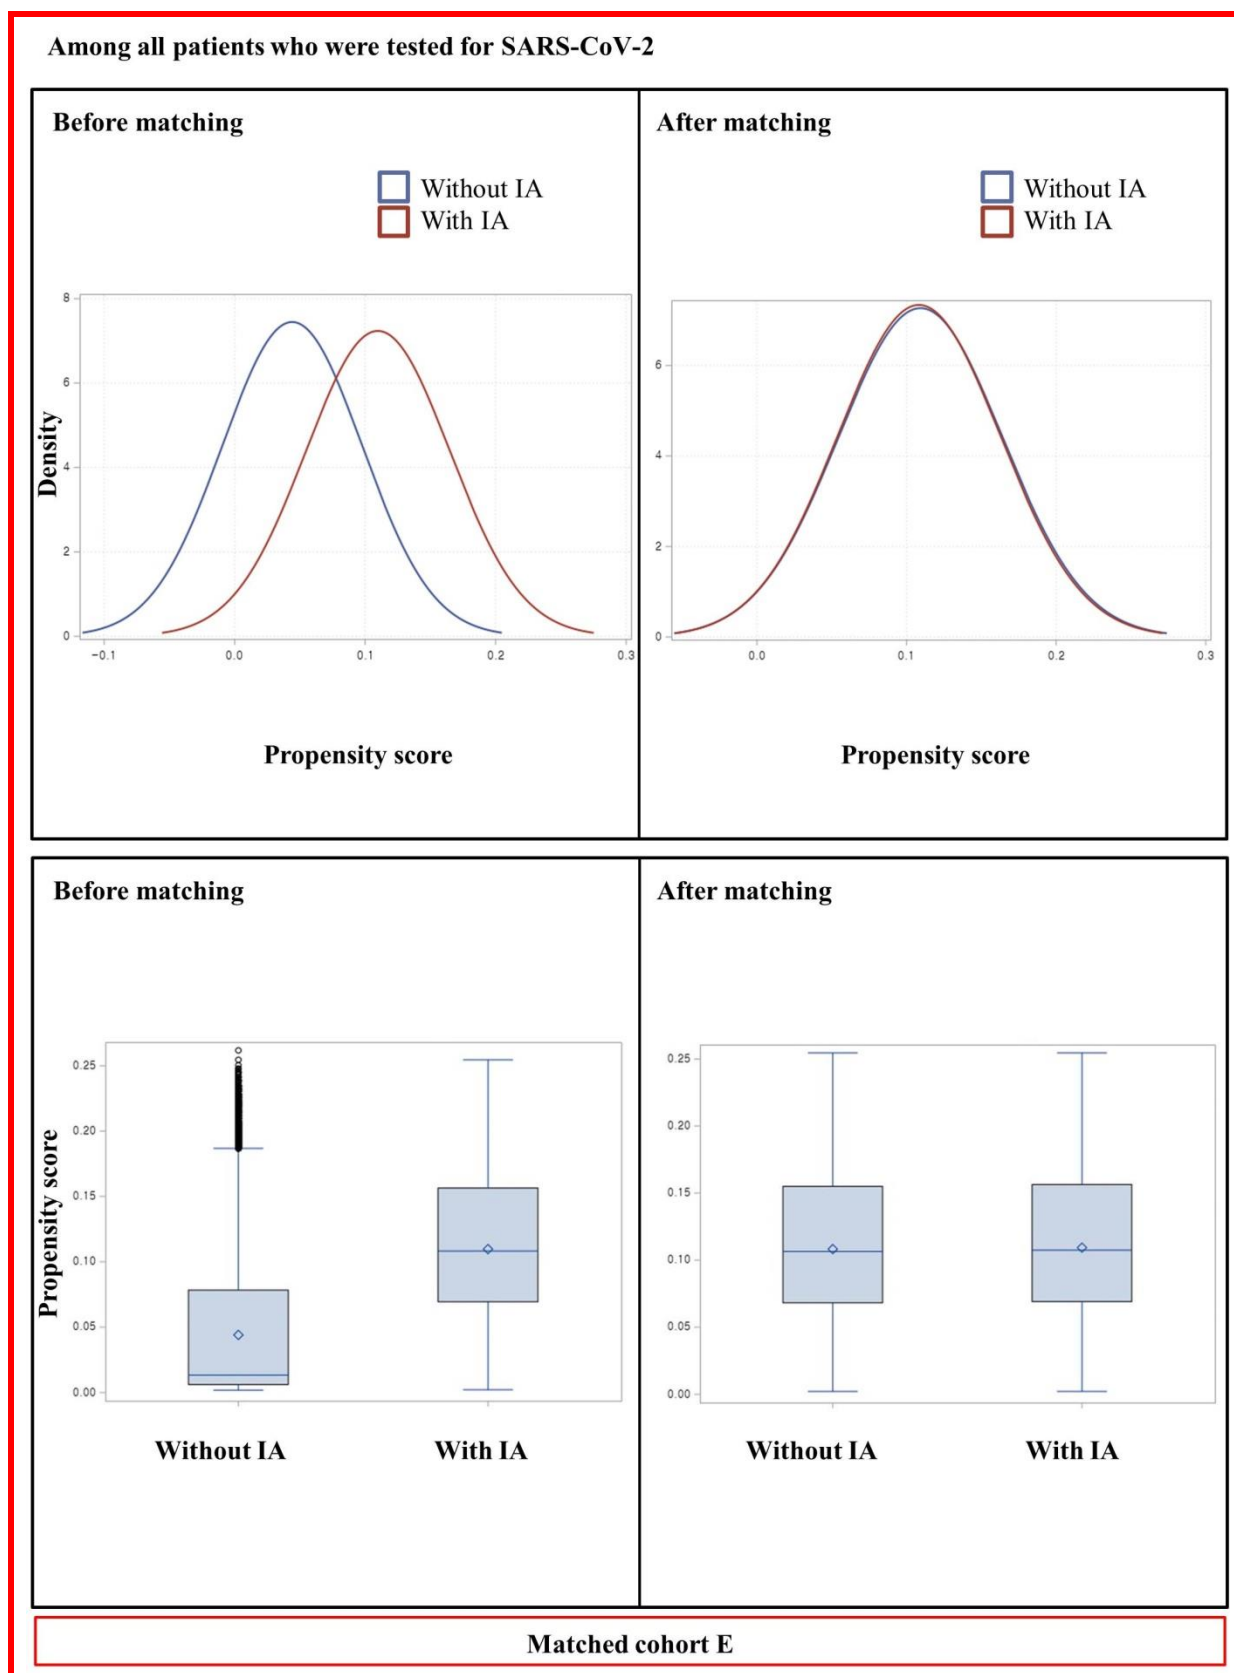



**Figure S8.** The density and distribution of propensity scores before and after matching in matched cohort F

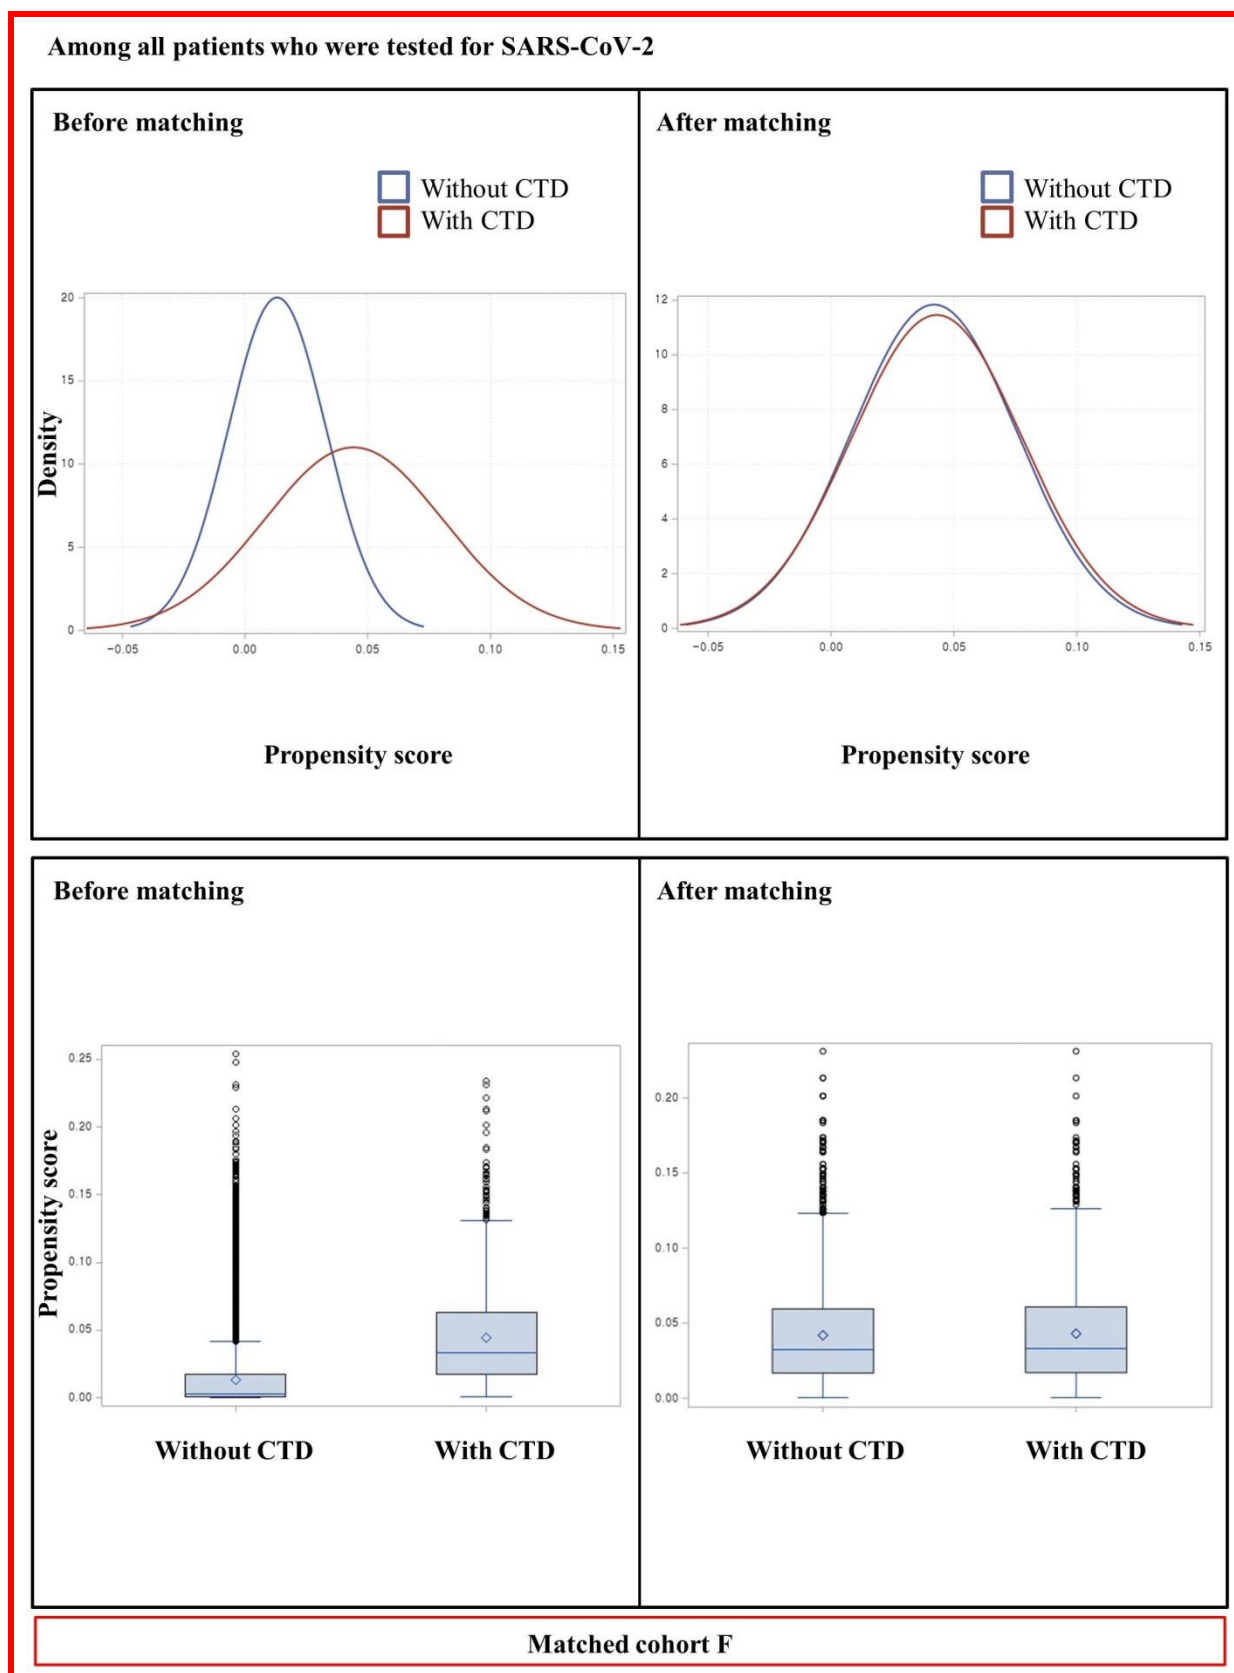

**Figure S9.** The density and distribution of propensity scores before and after matching in matched cohort G. After matching, the two curves overlap completely.

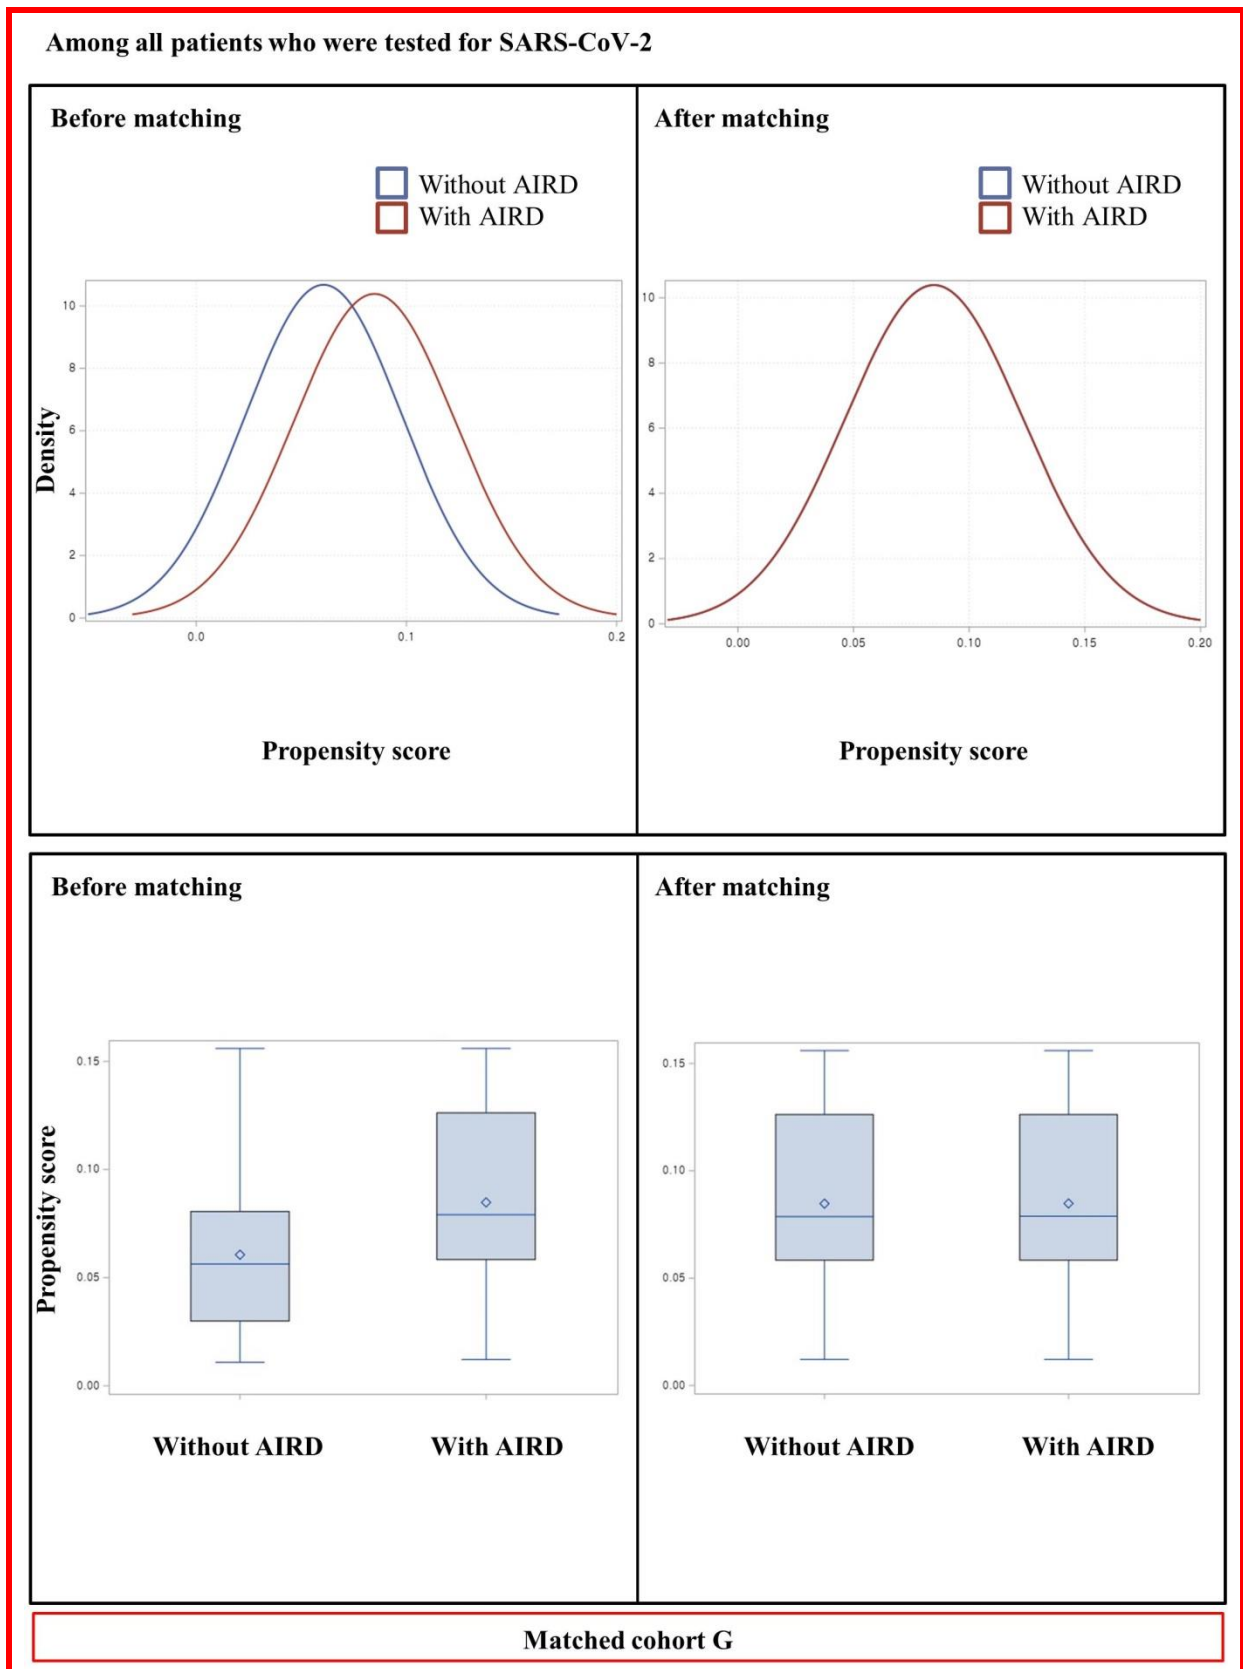

**Figure S10.** The density and distribution of propensity scores before and after matching in matched cohort H. After matching, the two curves overlap completely.

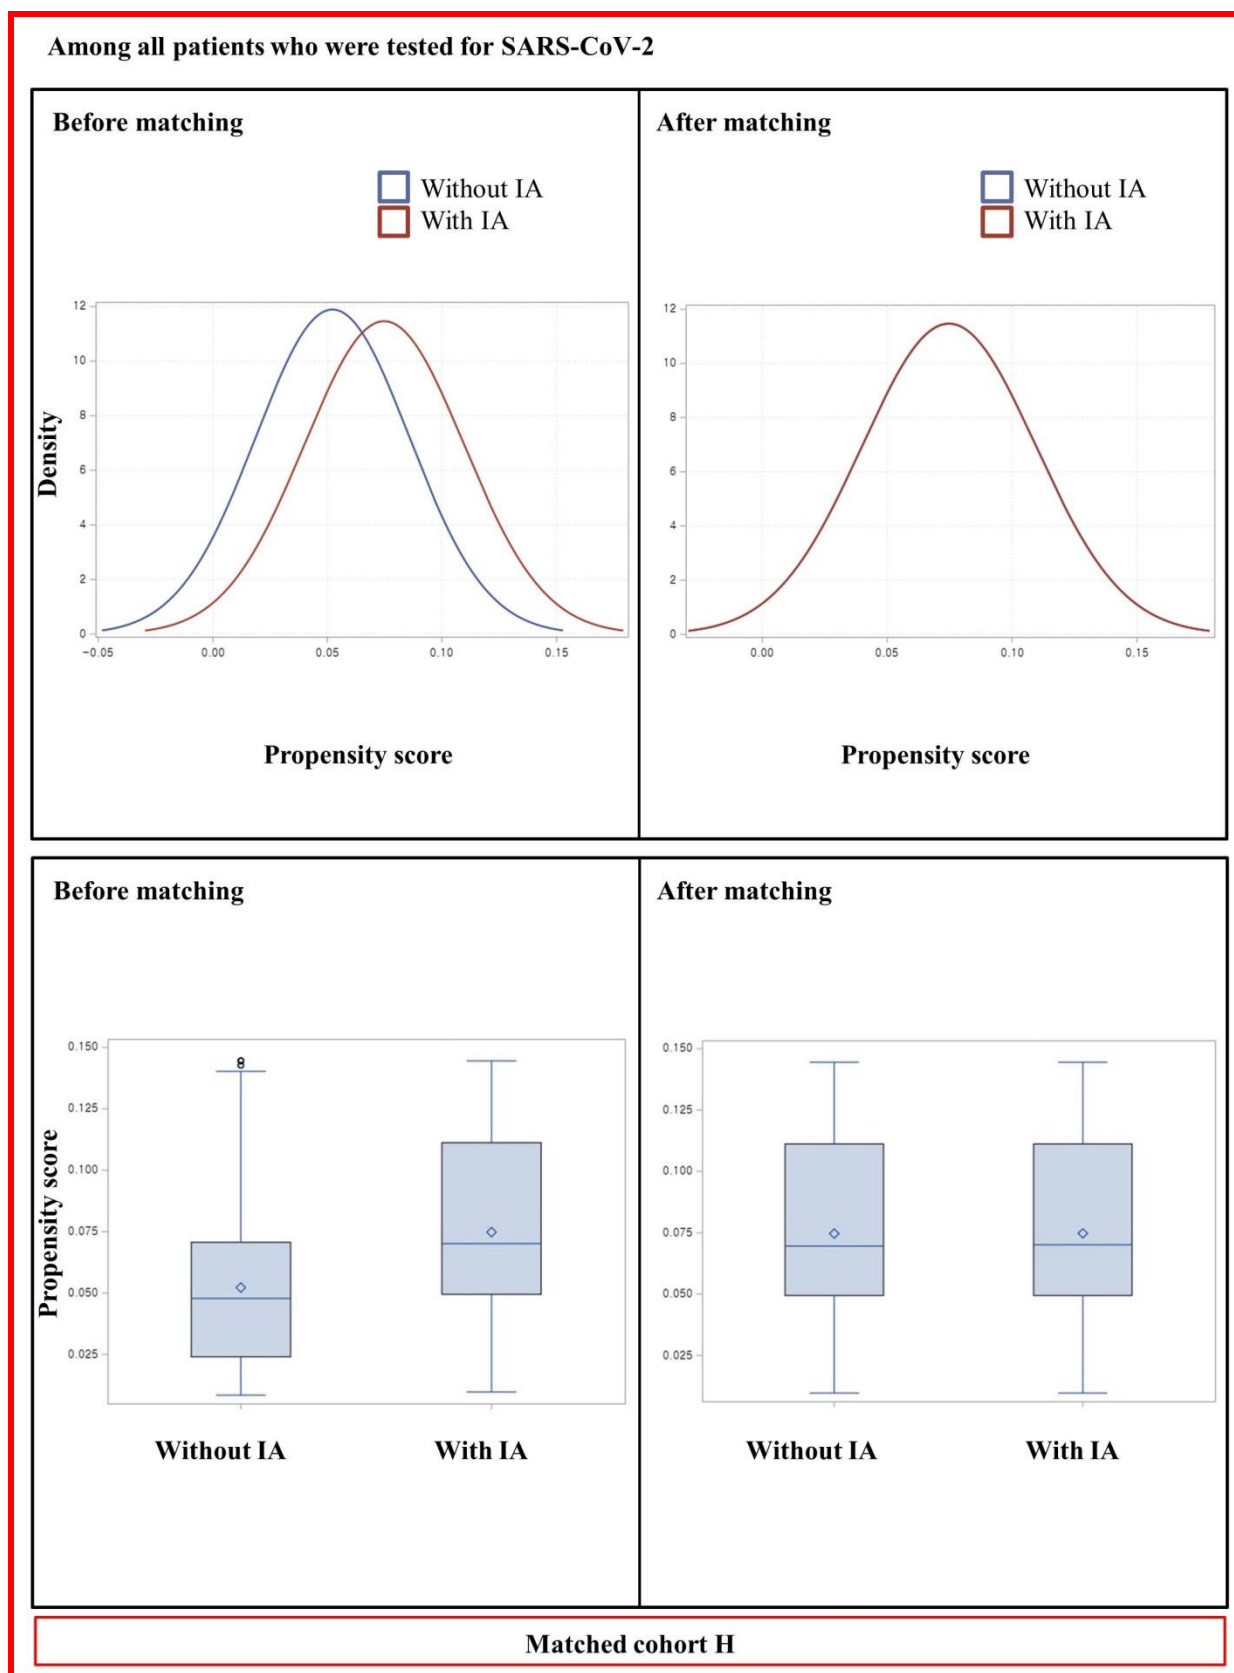

**Figure S11.** The density and distribution of propensity scores before and after matching in matched cohort I. After matching, the two curves overlap completely.

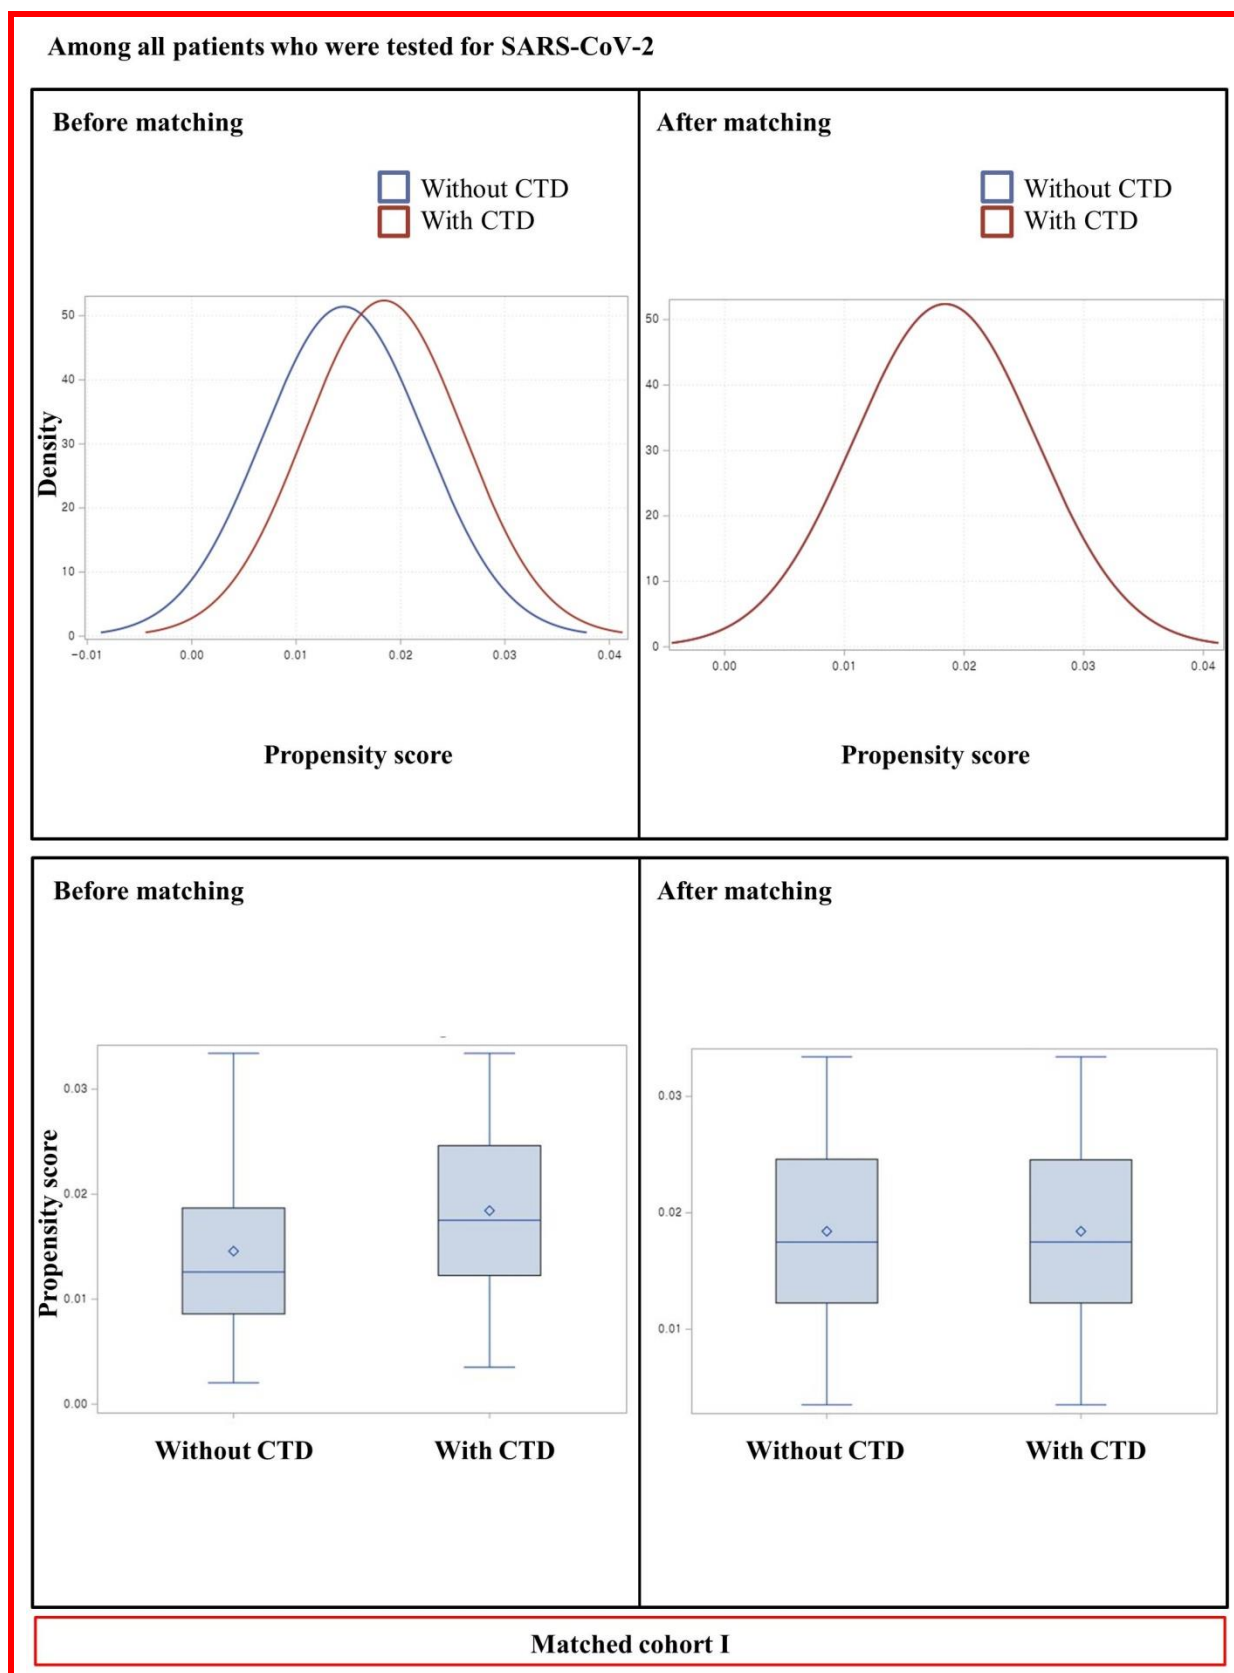

**Figure S12.** The density and distribution of propensity scores before and after matching in matched cohort J. After matching, the two curves overlap completely.

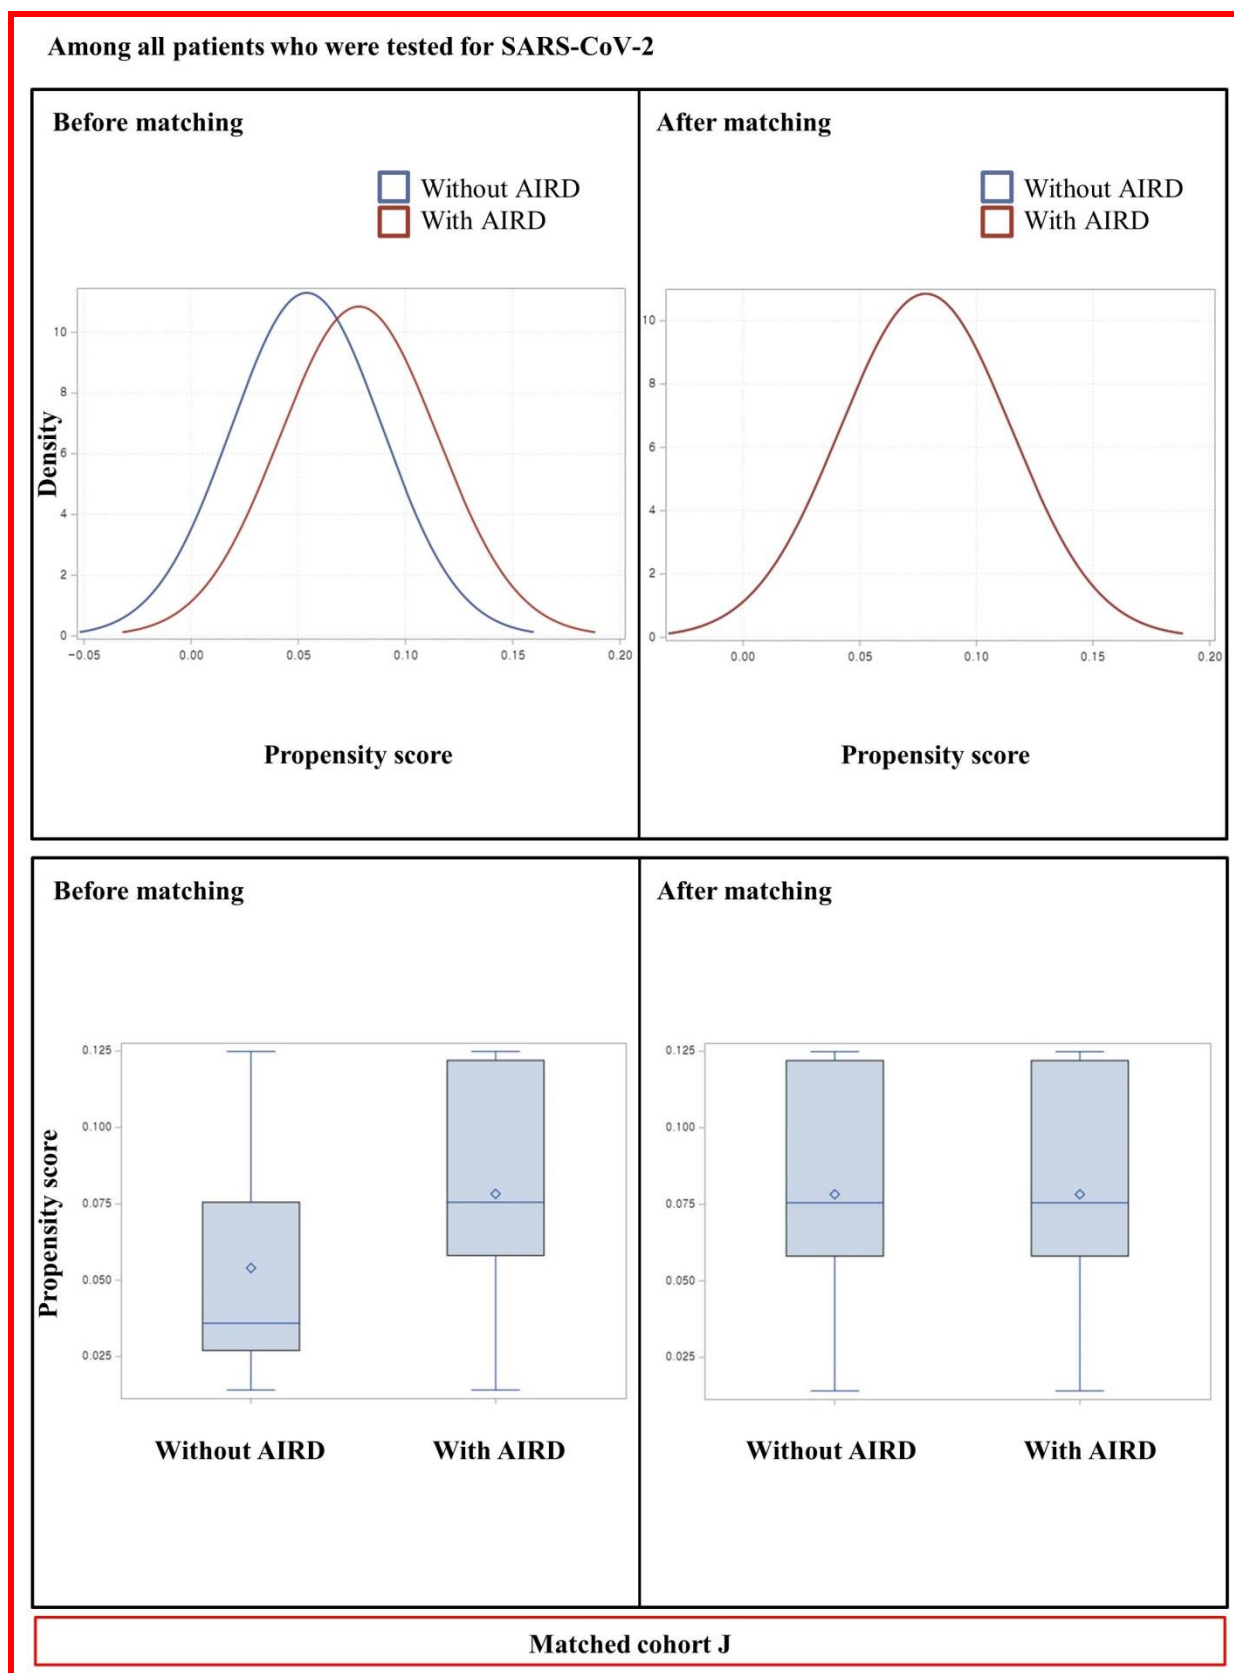

**Figure S13.** The density and distribution of propensity scores before and after matching in matched cohort K. After matching, the two curves overlap completely.

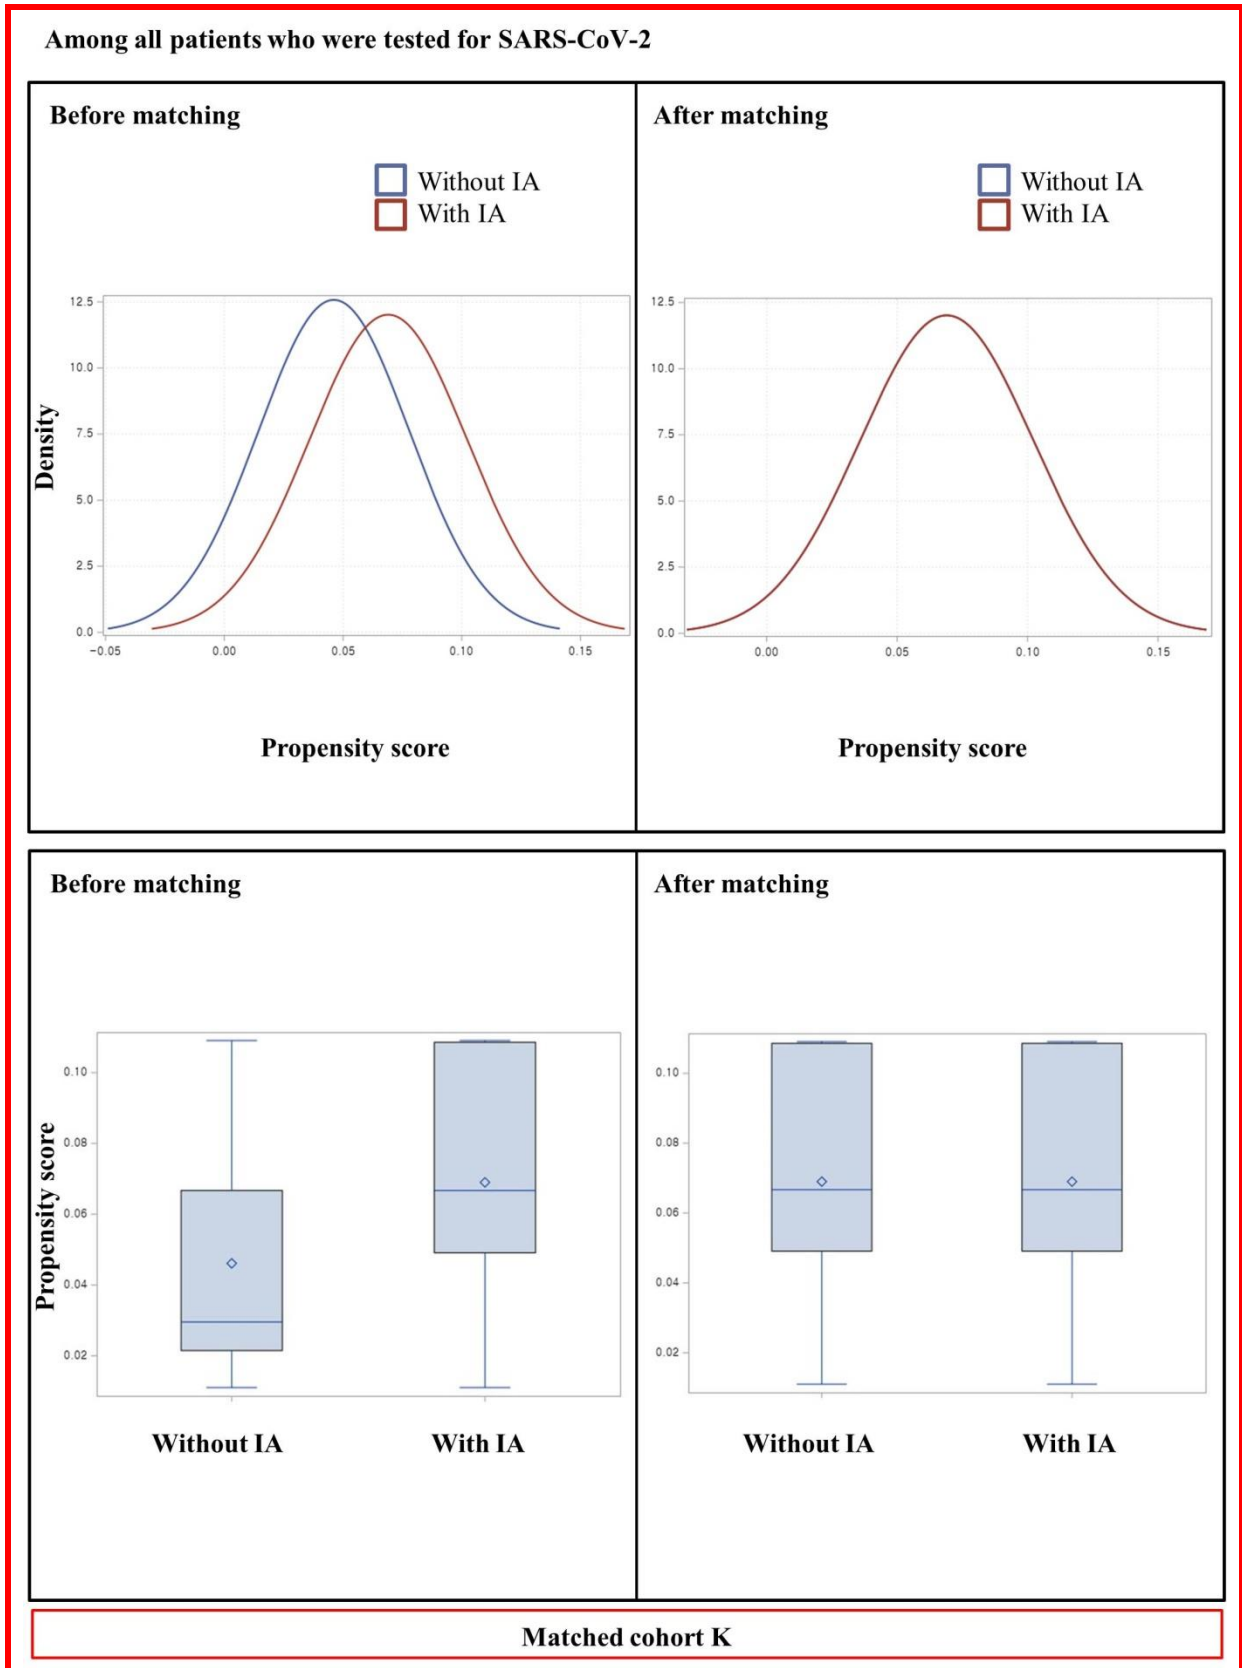

**Figure S14.** The density and distribution of propensity scores before and after matching in matched cohort L. After matching, the two curves overlap completely.

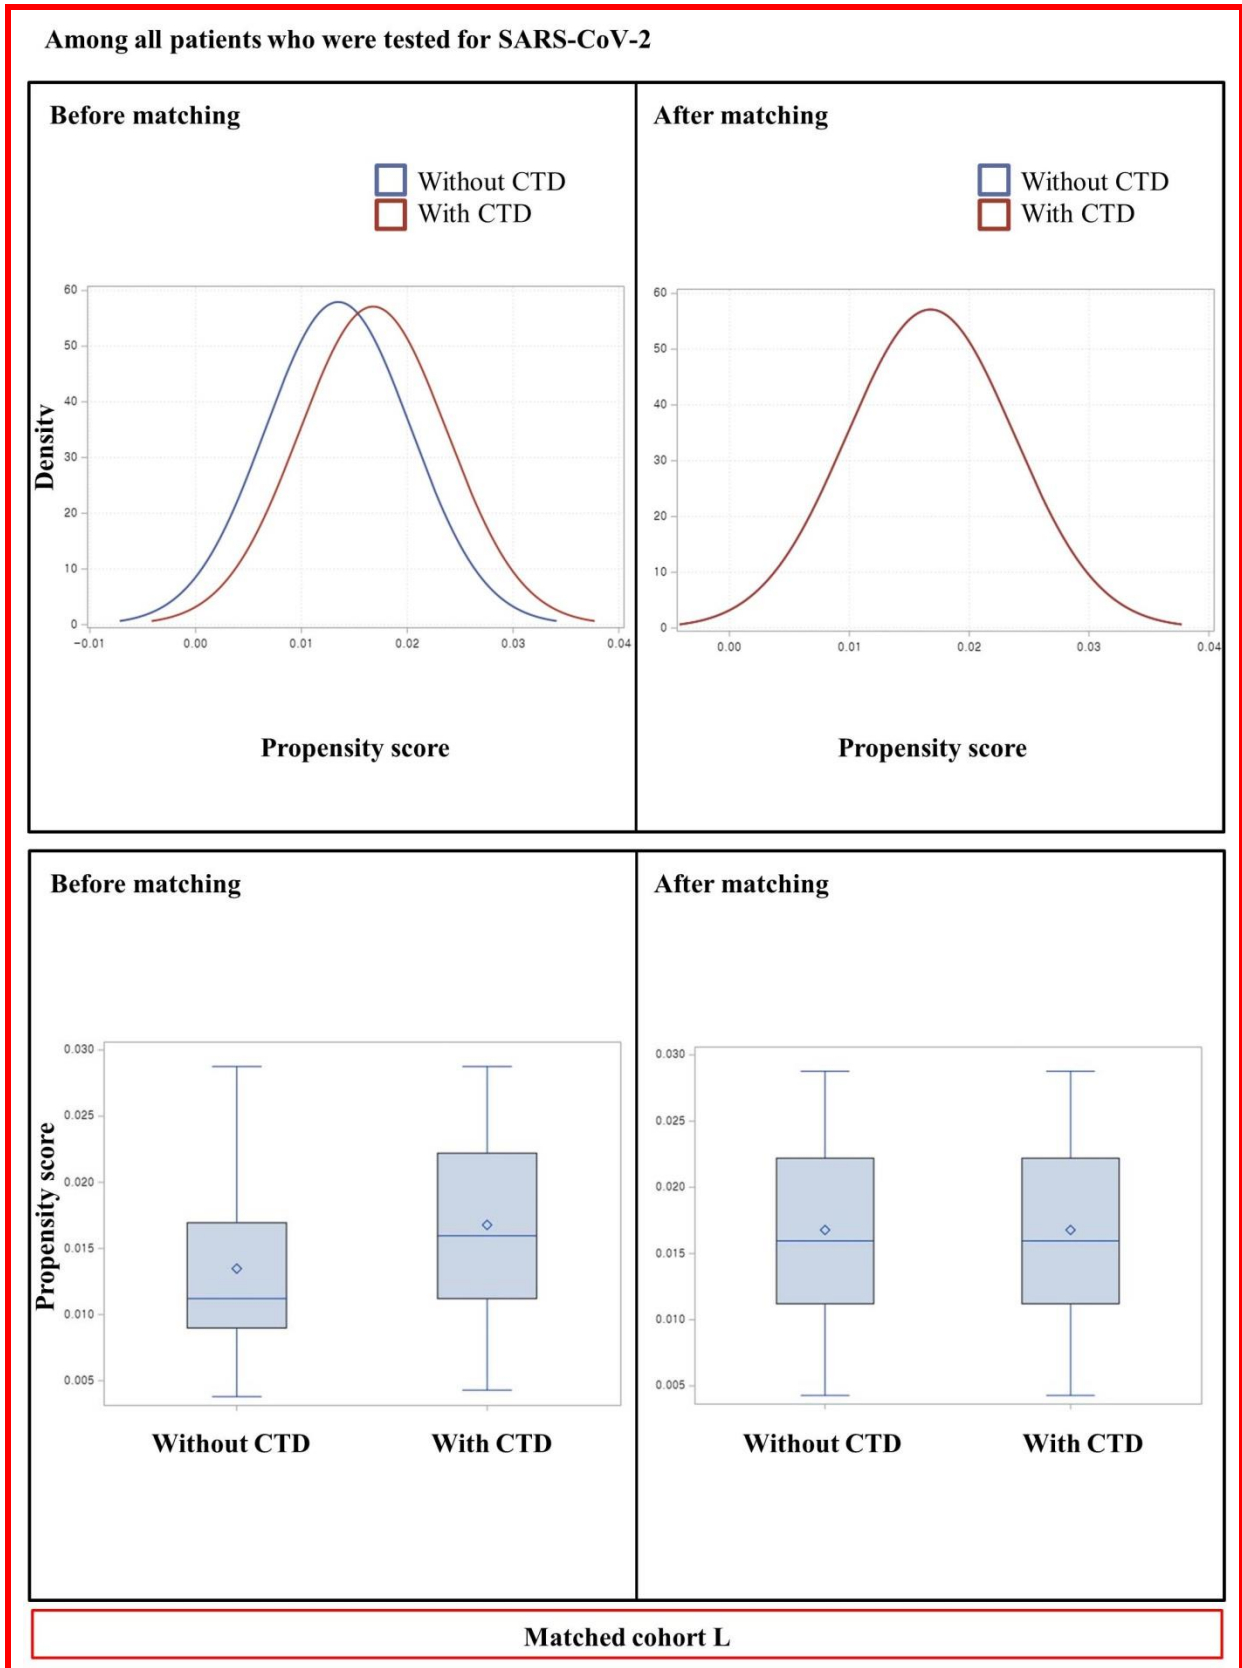

**Figure S15.** Directed acyclic graph demonstrating the implicitly assumed causal association between AIRD (“exposure”) and risk of COVID-19 (“outcome”) in the Korean nationwide cohort linked to the general health examination records before matching. Confounders, potential mediators, and exposure-outcome associations are indicated.

AIRD, autoimmune inflammatory rheumatic disease; BMI, body mass index; CBVD, Cerebrovascular disease; CKD, chronic kidney disease; COPD, chronic obstructive pulmonary disease; CVD, cardiovascular disease; DM, Diabetes Mellitus

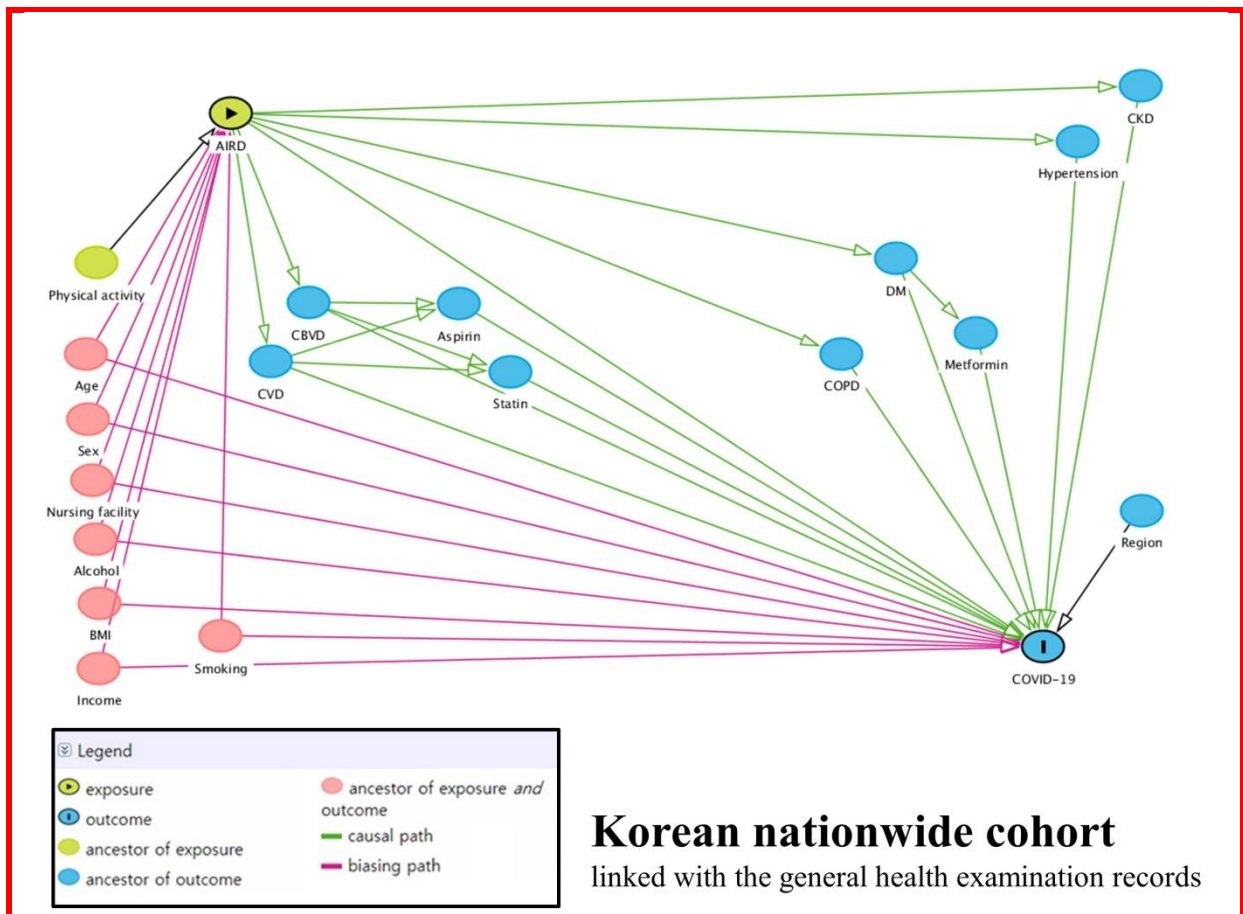



**Figure S16.** Directed acyclic graph showing the implicitly assumed causal association between AIRD (“exposure”) and risk of COVID-19 (“outcome”) in the Korean nationwide cohort without linking the general health examination records before matching. Confounders, potential mediators, and exposure-outcome associations are indicated.

AIRD, autoimmune inflammatory rheumatic disease; CBVD, Cerebrovascular disease; CKD, Chronic kidney disease; COPD, chronic obstructive pulmonary disease; CVD, cardiovascular disease; DM, Diabetes Mellitus

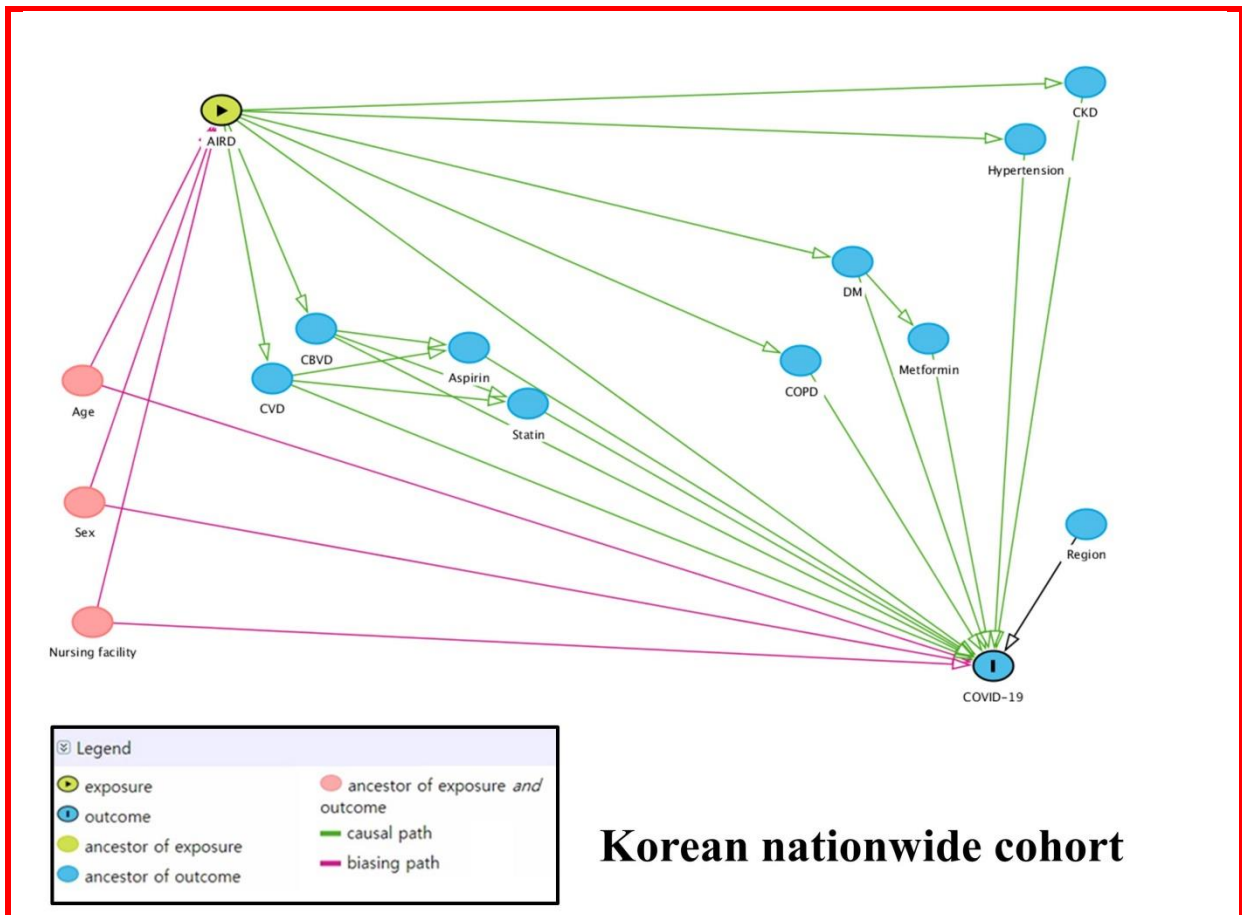

**Figure S17.** Propensity score-matched association of AIRD with SARS-CoV-2

AIRD, autoimmune inflammatory rheumatic disease; SARS-CoV-2, severe acute respiratory syndrome coronavirus 2.

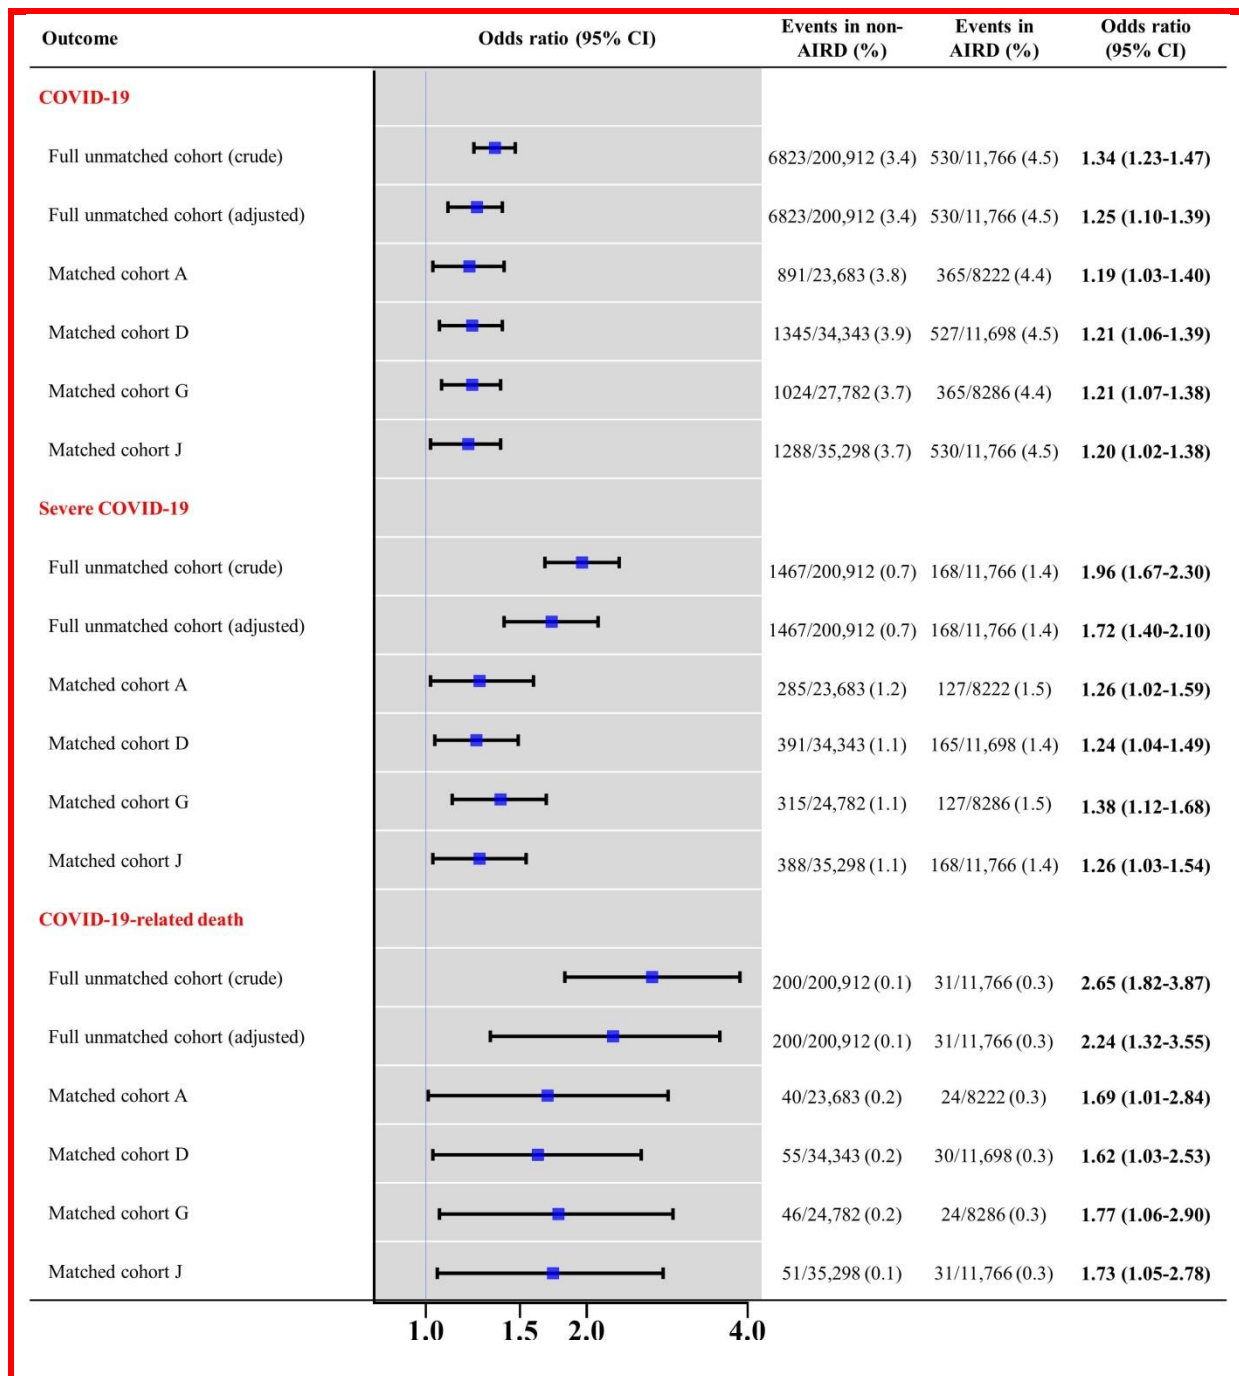

**Figure S18.** Propensity score-matched association of IA with SARS-CoV-2

AIRD, autoimmune inflammatory rheumatic disease; IA, inflammatory arthritis; SARS-CoV-2, severe acute respiratory syndrome coronavirus 2.

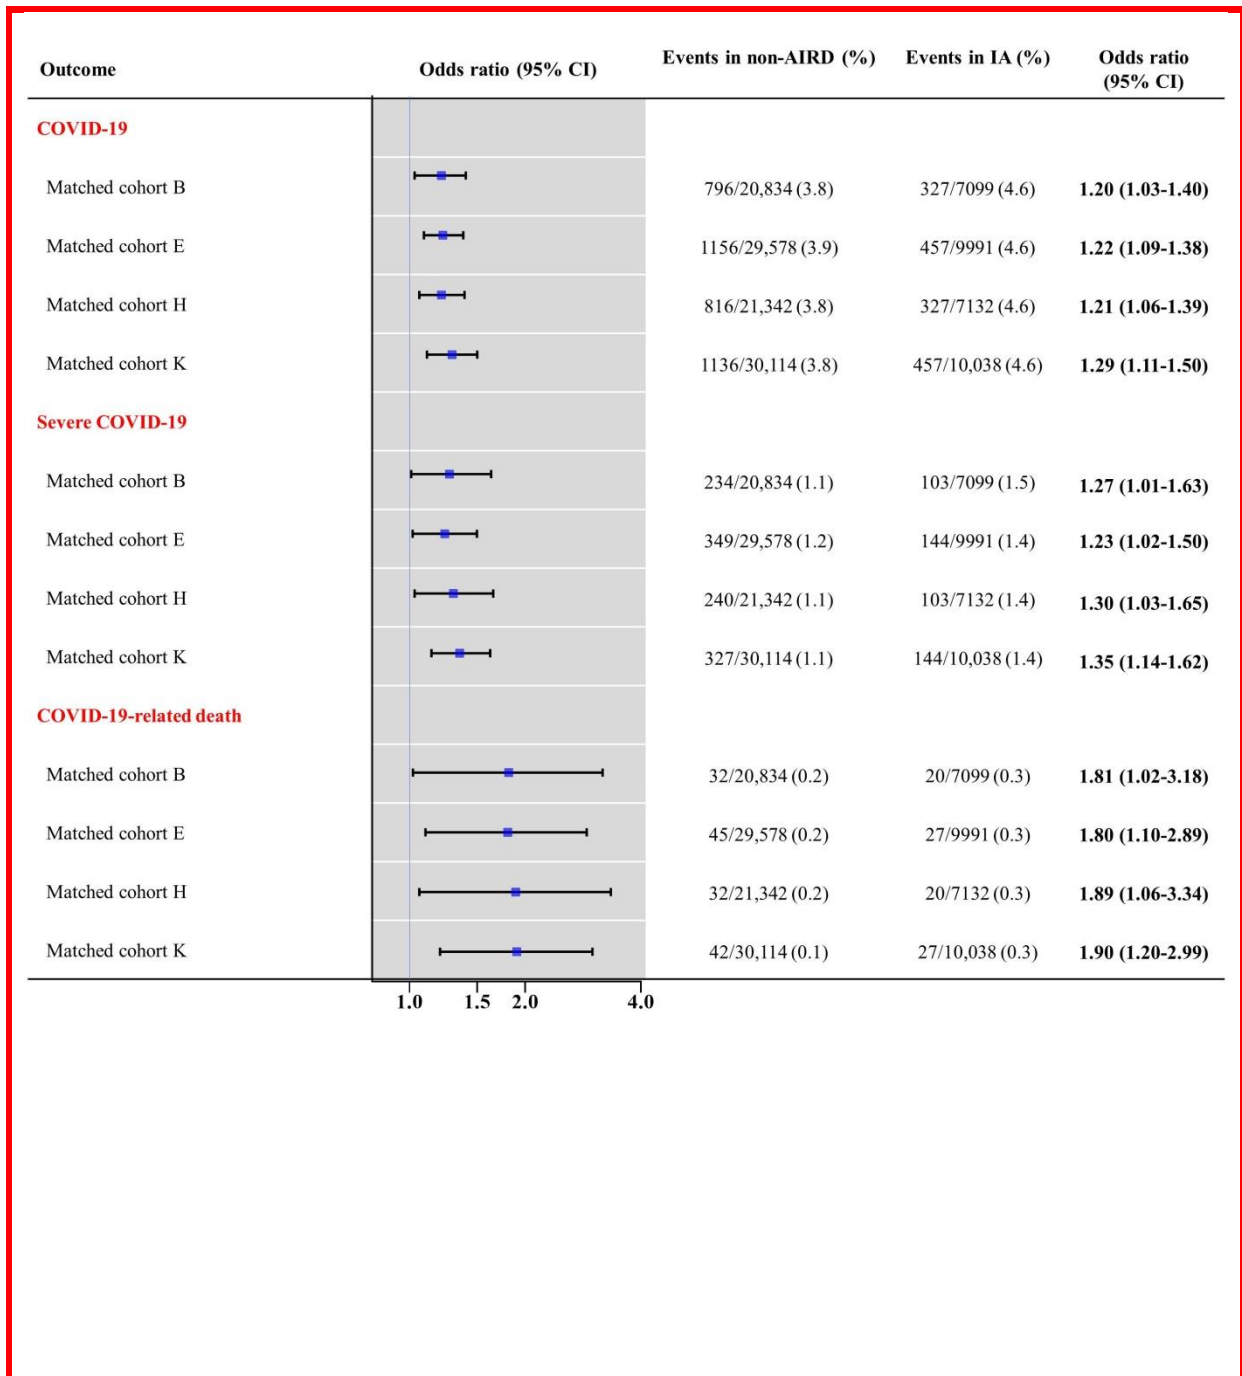

**Figure S19.** Propensity score-matched association of CTD with SARS-CoV-2

AIRD, autoimmune inflammatory rheumatic disease; CTD, connective tissue disease; SARS-CoV-2, severe acute respiratory syndrome coronavirus 2.

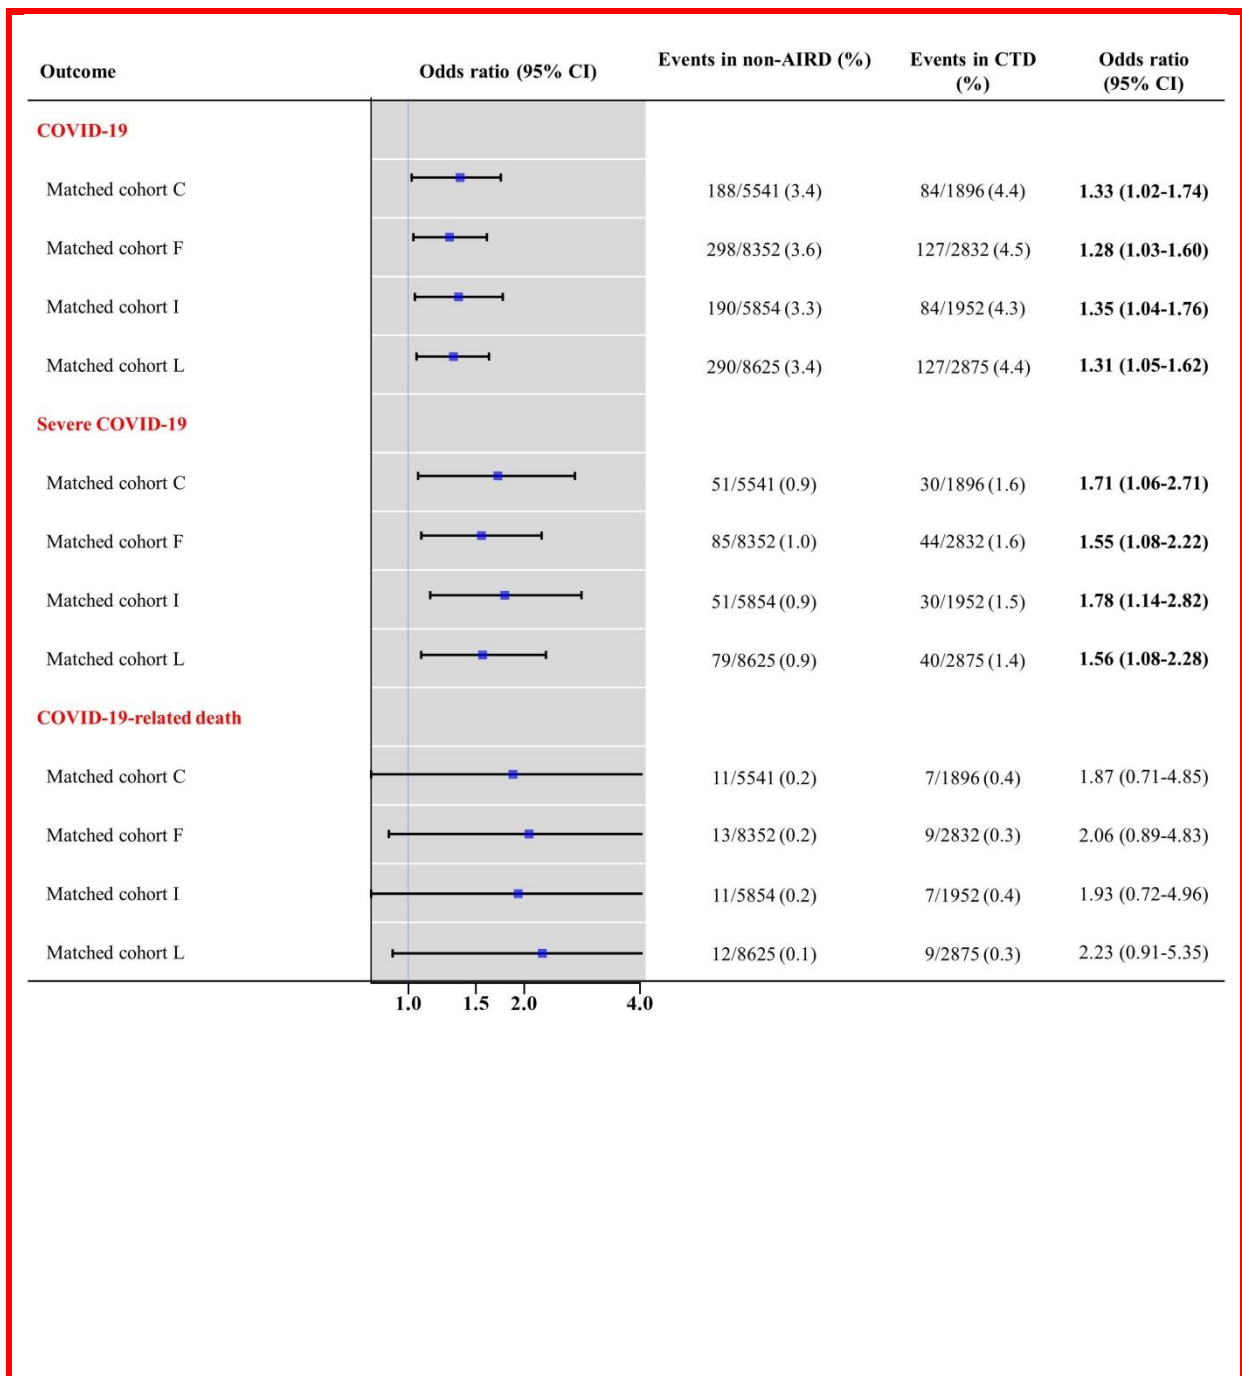

---

**Supplement Method.** ICD-10 codes used to define etiology

| <b>Etiology</b>           |                                 | <b>ICD-10 codes</b>          |
|---------------------------|---------------------------------|------------------------------|
| Inflammatory arthritis    | Rheumatoid arthritis            | M05, M06, M08.0, M08.2-M08.9 |
|                           | Psoriatic arthritis             | L40.5, M07.0-07.3            |
|                           | Spondyloarthritis               | M45.9, M08.1                 |
| Connective tissue disease | Systemic lupus erythematosus    | M32                          |
|                           | Sjogren's syndrome              | M35.0                        |
|                           | Systemic sclerosis              | M34.0, M34.1, M34.8, M34.9   |
|                           | Polymyalgia rheumatica          | M35.3                        |
|                           | Mixed connective tissue disease | M35.1                        |
|                           | Dermatomyositis/polymyositis    | M33                          |
|                           | Polyarteritis nodosa            | M30.0                        |
|                           | Vasculitis                      | I77.6, L95                   |

---

ICD-10, International Classification of Disease 10th revision.
